1           **Mechanisms of *Igf2* inhibition in thymic epithelial cells infected by**  
2                                                       **coxsackievirus CV-B4**

3  
4   Hélène Michaux<sup>a#</sup>, Aymen Halouani<sup>b</sup>, Charlotte Trussart<sup>a</sup>, Chantal Renard<sup>a</sup>, Hela  
5   Jaïdane<sup>b</sup>, Henri Martens<sup>a</sup>, Didier Hober<sup>c</sup>, Vincent Geenen<sup>a</sup>

6  
7   <sup>a</sup>Neuroimmunoendocrinology, Université de Liège GIGA Institute, Liège-Sart Tilman,  
8   Belgium

9   <sup>b</sup>Laboratoire des Maladies Transmissibles et Substances Biologiquement actives  
10   LR99ES27, Université El Manar (Tunis) and Université de Monastir, Monastir, Tunisia

11   <sup>c</sup>Laboratoire de Virologie EA3610, Université de Lille, Lille, France

12  
13   **Runing title**

14   Transcriptional decrease of *Igf2* in CVB4 infected TECs

15  
16   **#Corresponding author:**

17   Hélène Michaux, PhD

18   hmichaux88@gmail.com

19  
20  
21   **Keywords:** Thymus – Thymic epithelial cell (TEC) – Type 1 diabetes (T1D) –

22   Coxsackievirus B4 (CV-B4) – Insulin-like growth factor 2 (*IGF2/Igf2*) – Transcription

23   **Word count:** Abstract 182. Importance 149. Text 5519. References 60. Figures 6

24 **ABSTRACT**

25 Epidemiological studies have evidenced a link between type 1 diabetes (T1D) and  
26 infections by enteroviruses, especially with coxsackievirus B4 (CV-B4). CV-B4 is able to  
27 infect human and murine thymic epithelial cells (TECs) and, in a murine TEC line, we have  
28 shown that the diabetogenic strain CV-B4 E2 decreases transcription of insulin-like  
29 growth factor 2 gene (*Igf2*), coding for the self-peptide of the insulin family. Here we show  
30 that in CV-B4 infection of mice alters *Igf2* transcripts isoforms in TECs, followed by a  
31 decrease of pro-IGF2 precursor in the thymus. CV-B4 infection of a murine TEC line  
32 decreases *Igf2* P3 promoter activity by targeting the region -68 to -22 upstream of the  
33 transcription start site (TSS) whereas *Igf2* transcripts stability is not affected, pointing  
34 towards a regulation of *Igf2* transcription. Our data also show that CV-B4 decreases  
35 IL-6/STAT3 signaling *in vitro*. This study provides new knowledge about the regulation of  
36 intrathymic *Igf2* transcription by CV-B4 and reinforces the hypothesis that CV-B4 infection  
37 of the thymus could break central self-tolerance of the insulin family by decreasing *Igf2*  
38 transcription and IGF2 presentation in thymus epithelium.

39

40 **IMPORTANCE**

41 Coxsackievirus B4 represents one of the most important environmental factors associated  
42 to type 1 diabetes, autoimmune disease for which no curative treatment exist. The  
43 diabetogenic strain Coxsackievirus B4 E2 was previously shown to decrease *Igf2*  
44 expression, important player for central tolerance towards insulin, in a thymic epithelial  
45 cell line. The understanding of *Igf2* regulation mechanisms during coxsackievirus B4  
46 infection represents an interest for the understanding of central tolerance development  
47 but also for *Igf2* transcriptional regulation itself, still poorly understood.

48 Here we demonstrate that, some transcripts isoforms of *Igf2* are also decreased in thymic  
49 epithelial cells *in vivo*. Moreover, we show that this decrease is induced by an alteration of  
50 specific regions of *Igf2* P3 promoter and may be linked by a decrease of STAT3 signaling.  
51 *In fine* we hope that this work could lead to future therapies leading to reprogramming  
52 central tolerance towards  $\beta$  cells antigens via *Igf2* expression.

53 \_\_\_\_\_

## 54 INTRODUCTION

55 The presentation of neuroendocrine self-peptides by thymic epithelial cells (TECs) plays  
56 an essential role in programming immune self-tolerance to neuroendocrine functions and  
57 a defect in this process is the earliest event in the pathogenesis of autoimmune diseases  
58 such as type 1 diabetes (T1D) (1). Insulin-like growth factor 2 (IGF2) is the self-peptide of  
59 the insulin family and *Igf2* transcription is absent in the thymus of an animal model of T1D,  
60 the diabetes-prone Bio-Breeding (DP-BB) rat (2). Furthermore, *Igf2* expression is required  
61 for the establishment of complete immune self-tolerance of insulin (3).

62 Enteroviruses and especially coxsackievirus B (CV-B) are among the most important  
63 environmental factors that have been linked to T1D (4). *Enterovirus* genus is part of the  
64 *Picornaviridae* family. Enteroviruses are non-enveloped small viruses, composed of a  
65 single-strand positive RNA in an icosahedric capsid and are transmitted by orofecal route.  
66 The so-called diabetogenic strain CV-B4 E2 has been isolated from a child died from  
67 ketoacidosis after an acute T1D onset (5). CV-B4, frequently detected in T1D patients,  
68 has a tropism for pancreatic insulin-secreting  $\beta$  cells in Langerhans islets and various  
69 mechanisms were proposed to explain the induction of autoimmune T1D by enteroviruses  
70 (4).

71 For several years we have been investigating whether CV-B4 could infect the thymus and  
72 disturb its crucial function in the programming of central self-tolerance to the insulin family  
73 and to islet  $\beta$  cells. Following oral and intra-peritoneal inoculation, CV-B4 also infects the  
74 thymus, which leads to abnormal T-cells differentiation (6-9) and this was also observed in  
75 murine and human thymic fetal organ cultures (10, 11). Also, CV-B4 is able to induce a  
76 persistent infection of primary cultures of human TECs and to modulate their profile of

77 cytokine secretion (12). CV-B4 persistently infects the MTE4-14 cell line, a TEC line  
78 derived from neonatal mice (13), and this induces a drastic decrease in *Igf2* transcription  
79 and IGF2 production while *Igf1* transcription was much less affected (14).

80 In this study, we investigated the effects of CV-B4 E2 infection on *Igf2* transcription using  
81 an enrichment method of TECs (15, 16) from an outbred susceptible mice strain (9). We  
82 also explored mechanisms of the regulation of *Igf2* transcription in MTE4-14 cells induced  
83 by a short CV-B4 infection.

84

85 **RESULTS**

86 **CV-B4 E2 decreases *Igf2* transcripts and pro-IGF2 expression in TECs *in vivo***

87 *Igf2* is mainly found in TECs (CD45<sup>-</sup>), which encompass only a few percent of the thymic  
88 population. We decided to use for each thymus a depletion of thymocytes based on their  
89 positive CD45 expression to enrich in CD45<sup>-</sup> TECs (**Fig. 1A and 1B**). TECs  
90 (CD45<sup>-</sup>EpCAM<sup>+</sup>) were enriched in average 62-fold in CD45<sup>-</sup> sorted cells and accordingly,  
91 *total Igf2* mRNA relative level was in average 318-fold higher in CD45<sup>-</sup> sorted cells (TECs)  
92 compared to total thymic cells (**Fig. 1C**).

93 We investigated *Igf2* expression by RT-qPCR in TECs. It is known that murine *Igf2* gene  
94 contains three main promoters (P1, P2, P3) which give rise to three transcript isoforms  
95 differing only in their first exon (5'UTR): *Igf2 V3* (*Igf2* P3), *Igf2 V1* (*Igf2* P2), and *Igf2 V2*  
96 (*Igf2* P1) (17). *Igf2* Variant 3 (*Igf2 V3*) and *Igf2* Variant 2 mRNA (*Igf2 V2*) isoforms, main  
97 and minor *Igf2* transcripts isoforms respectively (**Fig. 1D**), were significantly decreased at  
98 2 days post-infection (P.I.) in infected mice. However, *Igf2* Variant 1 (*Igf2 V1*) was on the  
99 opposite upregulated by CV-B4 E2 after 3 days P.I., and *total Igf2* in TECs was not  
100 significantly decreased in CV-B4 E2 inoculated mice. At 7 days P.I., relative expression  
101 for each isoform returns to comparable level to mock-inoculated mice (**Fig. 1E**).

102 Next, IGF2 protein level and its precursors were analyzed in total thymic cell population  
103 (containing both thymocytes and TECs) by Western Blot. Mainly pro-IGF2 precursor form  
104 (18 kDa, dominant isoform) was detected whereas no mature IGF2 was observed.  
105 Interestingly, compared to mock-inoculated mice, pro-IGF2 level was significantly  
106 decreased during the course of the infection, especially at day 7 P.I (**Fig. 1F**). Collectively,  
107 these results suggest that CV-B4 is able to decrease *Igf2* at mRNA and protein level in the

108 thymus. Of note, despite evident sign of CV-B4 infection detected in all pancreases  
109 sampled from CV-B4 inoculated mice, CV-B4 viral RNA was surprisingly not detected  
110 within thymic cells (**Fig. 1G**).

### 111 **CV-B4 E2 decreases *Igf2* transcripts and pro-IGF2 expression in MTE4-14 cell line**

112 Among *Igf2* transcripts, only *Igf2 V1* and *Igf2 V3* mRNA are detected by RT-PCR in  
113 MTE4-14 cell line (**Fig. 2A**) with a large dominant expression of *Igf2 V3* (**Fig. 2B**). During  
114 the course of CV-B4<sub>MOI = 0.05</sub> infection, RT-qPCR results show a significant and gradual  
115 decrease of *total Igf2*, starting at day 2 P.I. Moreover, among *Igf2* mRNA transcripts, both  
116 *Igf2 V3* and *Igf2 V1* were decreased of 74% at day 3 P.I. in CV-B4<sub>MOI = 0.05</sub> infected cells  
117 (**Fig. 3A**). Regulator of cell cycle *Tp53*, and apoptosis regulators *Birc5* and *Bax*,  
118 previously shown to be modulated during enterovirus or by others single-stranded positive  
119 RNA viruses (18-20), were not altered during the time course of infection with CV-B4<sub>MOI =</sub>  
120 0.05 (**Fig. 3B**).

121 Protein level of IGF2 and its precursors were investigated by Western Blot as in Fig. 1. As  
122 shown above *in vivo*, no mature IGF2 was detectable in mock and in CV-B4<sub>MOI = 0.05</sub>  
123 infected cells. As in Fig. 1F, we were able to detect mainly pro-IGF2 at a molecular weight  
124 comparable as in the thymus *in vivo*. During the time course of infection in MTE4-14,  
125 pro-IGF2 decreased gradually, especially at day 3 P.I. where a loss of 51% was measured  
126 in CV-B4<sub>MOI = 0.05</sub> infected cells (**Fig. 3C**).

127 Together these results show that CV-B4 is able to decrease both at mRNA and protein  
128 level IGF2 in MTE4-14 cell line. Of note as *Igf2* expression decreases, a concomitant  
129 increase of CV-B4 replication and production can be observed (**Fig. 3D-F**).

130

131 **CV-B4 E2 decreases *Igf2* P3 promoter activity**

132 We hypothesized that the decrease of *Igf2* V3 mRNA (dominant *Igf2* transcript isoform in  
133 MTE4-14 cell line) in CV-B4 E2 infected cells could have a transcriptional origin. For this,  
134 we cloned *Igf2* P3 promoter (-168 to +175 relative to the TSS) upstream of Nanoluciferase  
135 coding sequence in a reporter vector (**Fig. 4A**). Whereas *Igf2* P3 promoter activity is  
136 unchanged at day 1 P.I., results show a significant decrease of *Igf2* P3 promoter activity at  
137 2 days P.I. of 38% in CV-B4<sub>MOI = 0.05</sub> infected cells. Moreover, this effect increases as the  
138 CV-B4 multiplicity of infection increases (**Fig. 4B**). To further determine whether the *Igf2*  
139 decrease in infected cells has a post-transcriptional origin, we analyzed by RT-qPCR *Igf2*  
140 V3 mRNA expression followed by actinomycin D treatment at 2 days P.I. However, this  
141 analysis did not reveal a significant difference of *Igf2* V3 mRNA stability between mock  
142 and CV-B4 infected cells even after 10 hours of treatment; mRNA half-life was estimated  
143 at 8.6 h and 9.5 h respectively in mock and in infected cells (**Fig. 4C**). Together these  
144 results exclude the possibility that CV-B4 plays a significant role at the post-transcriptional  
145 level on *Igf2* expression and indicate that *Igf2* mRNA decrease is rather associated with a  
146 decrease of *Igf2* P3 promoter activity.

147 Proximal promoter contains multiple binding sites specific for diverse transcription factors.  
148 To identify binding sites of *Igf2* P3 (-168 to +175 relative to the TSS) that play a role in the  
149 decrease of *Igf2* P3 promoter activity, we created a series of truncation constructs and  
150 tested them at day 2 P.I. in a transient luciferase reporter system as above (**Fig. 5A**). In  
151 mock and in CV-B4<sub>MOI = 0.05</sub> infected cells, the progressive deletion in *Igf2* P3 (-168 to  
152 +175) induced a gradual decrease of promoter activity, until the construct P197 (-22 to  
153 +175) where no promoter activity was detectable in all conditions (**Fig. 5B**). Similar results



154 were obtained with constructs containing *Igf2* P3 promoter containing sequence  
155 downstream -22 (data not shown), identifying the region -168 to -22 as essential for *Igf2*  
156 P3 promoter minimal activity. Promoter activity of the construct P243 (-68 to +175) and  
157 P230 (-55 to +175) were significantly decreased in infected cells (**Fig. 5C**), while construct  
158 P291 (-116 to +175) did not reveal any significant change in infected cells indicating that  
159 the region -68 to -22 is downregulated by CV-B4<sub>MOI = 0.05</sub>. To explore if the region -168 to  
160 -116 plays a role in the decrease of *Igf2* P3 promoter activity, we realized the construction  
161 P248\* containing the region -168 to -116 but not the region -116 to -22. Although this  
162 region represents less than 10% of *Igf2* P3 promoter activity, we were able to detect a  
163 significant decrease of *Igf2* P3 promoter activity with the construct P248\* in infected cells  
164 revealing that the region -168 to -116 is also downregulated by CV-B4<sub>MOI = 0.05</sub>. We noticed  
165 that in the presence of the construct P307 (which do not contain the region -151 to -116)  
166 promoter activity in mock cells was significantly higher ( $p = 0.0242$ ) than with the full *Igf2*  
167 P3 promoter (-168 to -116) revealing presence of potential negative regulator element in  
168 the region -151 to -116. However, results show that this element in this region does not  
169 play a role in infected cells compared to the full promoter (**Fig. 5C**).

170 We used then bioinformatics prediction software (21) to search for corresponding  
171 transcription factor which could bind to the region -68 to -22, representing the main region  
172 affected by CV-B4. Several putative binding sites for transcription factors were identified  
173 in this region (**Table 1**), as one binding site for the transcription factor Specificity Protein  
174 (SP) family, one for Krüppel-Like Factors family (KLFs), and one binding site for Zinc  
175 Finger Protein 263 (ZFP263). Binding sites for ZFP263, SP family were also identified in  
176 the region -168 to -116 (**Table 1**).

177 **CV-B4 E2 alters IL-6/STAT3 signaling and decreases STAT3 phosphorylation**

178 Given that Signal transducer and activator of transcription 3 (STAT3) acts as positive  
179 regulators of *Igf2* transcripts in human and in mice (22, 23), STAT3 protein expression and  
180 phosphorylation (STAT3<sup>pY705</sup>) level were analyzed by Western Blot. Results show that  
181 CV-B4<sub>MOI = 0.05</sub> decreases gradually STAT3<sup>pY705</sup> during the course of the infection,  
182 whereas STAT3<sup>total</sup> was not significantly affected. STAT3<sup>pY705</sup> was decreased of 51% and  
183 65% respectively at 2 and 3 days P.I. (**Fig. 6A**). In line with this result, *Bcl2*, a STAT3  
184 response gene (24), was similarly decreased during the time course of CV-B4 infection in  
185 MTE4-14 (**Fig. 6B**).

186 However, *Il6*, activator of STAT3<sup>pY705</sup>, was upregulated in infected cells (**Fig. 6C**) which is  
187 in discordance with the observed decrease of STAT3<sup>pY705</sup>. We then investigated  
188 expression of the receptor IL6R $\alpha$  (CD126) by flow cytometry but we were not able to  
189 detect a significant difference between mock and infected cells (**Fig. 6D**).

190 Previous reports indicate that suppressor of cytokine signaling 3 (SOCS3), a negative  
191 regulator of STAT3 activation, is induced by CV-B3 (25, 26). SOCS3 protein expression  
192 was analyzed by Western Blot and was not upregulated during the infection. On the  
193 opposite, SOCS3 protein level tends to decrease during the infection (**Fig. 6E**). More  
194 recently shown to play a negative role in STAT3<sup>pY705</sup> activation (27-30), expression of the  
195 c-Jun N-terminal Kinase (JNK) and the Extracellular signal-Regulated protein Kinase  
196 (ERK) were analyzed in MTE4-14 infected cells. At 2 days P.I., we observed that  
197 phosphorylated JNK and phosphorylated ERK were both increased whereas level of  
198 JNK<sup>total</sup> or ERK<sup>total</sup> remained unchanged (**Fig. 6F-G**).

199

## 200 **DISCUSSION**

201 In this research, we firstly investigate the effect of CV-B4 E2 on *Igf2* expression in murine  
202 TECs *in vivo*. The analysis of *Igf2* transcripts isoforms in mock inoculated mice revealed  
203 that *Igf2 V3* and *Igf2 V1* are the isoforms which can be mainly detected in CD45<sup>-</sup> enriched  
204 TECs. These results corroborate with previous reports on human TECs showing that  
205 *IGF2 P3* and *IGF2 P4*, homologous promoter of *Igf2 V1* and *Igf2 V3* respectively are  
206 active in these cells (31) and accordingly, much less *Igf2 V2* in CD45<sup>-</sup> enriched TECs was  
207 detected. In CV-B4 inoculated mice, both *Igf2 V3* and *Igf2 V2* were decreased followed  
208 by an upregulation of *Igf2 V1*. These results explained why *total Igf2* (representing  
209 quantitatively sum of all *Igf2* isoforms) was not decreased in infected mice and indicate a  
210 differential regulation of *Igf2* mRNA transcripts in the thymus by CV-B4 E2. Thus, distinct  
211 pathways may regulate *Igf2 V3* and *V1* mRNA isoforms during CV-B4 infection. This  
212 temporal decrease of *Igf2 V3* and *Igf2 V2* was nevertheless sufficient to achieve a later  
213 significant decrease of Pro-IGF2. Consequently a role of CV-B4 on IGF2 presentation in  
214 the thymus cannot be excluded, indeed it was shown that CV-B3 is able to alter class I  
215 antigen presentation (32). Nevertheless, we were not able to detect any mature IGF2  
216 neither in the thymus nor in the TEC cell line MTE4-14. A differential processing of IGF2  
217 may occur in the thymus. It was reported that in rat, mature forms of IGF2 are also not  
218 found in the brain (33). Moreover, sequencing data of TECs indicates low mRNA  
219 expression level of protein convertase PC4 (*Pcsk4*), enzyme cleaving pro-IGF2 in mature  
220 IGF2. A low thymic expression of *Pcsk4* would affect IGF2 processing and would allow  
221 only the detection of IGF2 immature precursors (34, 35). In mice inoculated with CV-B4,  
222 we were able to detect CV-B4 RNA in the pancreas. However, CV-B4 RNA was not

223 detected in the thymus which is in discordance with previous reports reporting the  
224 presence of CV-B4 RNA in the whole thymus (9, 36). It is likely that the method we  
225 employed here for TECs enrichment has interfered negatively with the detection of  
226 CV-B4 as it only allows to detect CV-B4 RNA within the cells (**Table 2**). Nonetheless, this  
227 result indicates that CV-B4 could not replicate as much as expected within murine thymic  
228 cells. Of note, attempts to detect CV-B3 replication within cells of murine thymus have  
229 similarly failed (37, 38).

230 Interestingly, several reports show that interferon (IFN)- $\alpha$  or IFN- $\beta$  are able to decrease  
231 *Igf2* expression (39-41) and that inactivated CV-Bs virions, by interacting with  
232 extracellular Toll-like receptors (TLRs), can still upregulate these interferon suggesting  
233 that no replication within cells is actually required to induce IFN expression (42). Thus,  
234 CV-B4 draining not replicative virions, within the thymus could induce via TLRs IFN- $\alpha$  or  
235 IFN- $\beta$  which may then alter *Igf2* transcripts.

236 The second objective of this study was to explore mechanisms of *Igf2* decrease in  
237 MTE4-14 cells infected with CV-B4 E2. Similar to the results obtained *in vivo*, *Igf2* V3 and  
238 *Igf2* V1 are both detected in the cell line with a dominance of *Igf2* V3 reflecting a  
239 dominant activity of *Igf2* P3 and a lower activity of *Igf2* P2. Both *Igf2* V3 and *Igf2* V1 were  
240 downregulated concomitantly to the increase of CV-B4 replication and production. Given  
241 that *Igf2* V1 was on the opposite increased *in vivo* and CV-B4 E2 viral RNA not replicative  
242 (or under the limit of detection) within murine thymic cells, a differential regulation  
243 scenario of *Igf2* V1 isoforms, possibly related to CV-B4 replication, might takes place in  
244 the MTE4-14 cell line, where a higher rate of CV-B4 replication occurred.

245 In this study, we demonstrate that the decrease of *Igf2* V3 major isoforms is due to a

246 decrease of *Igf2 P3* promoter activity (-168 to +175 relative to the TSS) revealing a  
247 downregulation of *Igf2 V3* at the transcriptional level. *Igf2 V3* mRNA stability was not  
248 affected in infected cells which confirm the regulation of *Igf2 V3* mRNA at the  
249 transcriptional level. Previous studies on *total Igf2* mRNA stability indicate that *total Igf2*  
250 is a highly stable transcript (43, 44). Our results demonstrate also the promoter region of  
251 *Igf2 P3* -68 to -22 (relative to the TSS) and secondary the region *Igf2 P3* -168 to -116  
252 (relative to the TSS) as regulated negatively by CV-B4. Nonetheless, as we used only  
253 CV-B4<sub>MOI = 0.05</sub> for this analysis, we can expect that with higher MOI, others *Igf2 P3*  
254 promoter regions might be affected. Predictive analysis of *Igf2 P3* -68 to -22 (relative to  
255 the TSS) shows binding sites corresponding to transcription factor from the SP/KLF  
256 family. Among them, SP1 was accordingly identified as positive activator of human *Igf2*  
257 *P4* (homologous to the murine *Igf2 P3* promoter) (45). Besides this, the SP/KLFs  
258 transcription factor families were shown to play essential roles in differentiation,  
259 development, proliferation or cell death regulation. Interestingly, KLFs transcription  
260 factors play a role for thymocytes development (46-48). Further studies would be  
261 required to explore *Igf2* regulation by KLFs during CV-B4 infection which could link the  
262 observed alteration of thymocytes differentiation (10, 11) and the decrease of *Igf2 V3*.

263 STAT3, playing a role in *Igf2* expression, has been shown recently to be indispensable  
264 for TECs development and survivals (49-51). Here in this study, we identified also that  
265 CV-B4 decreases STAT3<sup>pY705</sup> in a thymic epithelial cell line. Moreover, the analysis of the  
266 *Igf2 P3* region -168 to -116 (related to the TSS) revealed an E2F binding site which may  
267 be recognized by STAT3 (52). It is then possible that the decrease of *Igf2 P3* promoter  
268 activity would be linked, at least, in part to a decrease of STAT3<sup>pY705</sup>. Additionally, as *Ilf6*

269 was upregulated in infected cells, this work revealed an inhibition of IL-6/STAT3  
270 signaling. This upregulation has been previously reported in TECs and in MTE4-14 as  
271 well (12, 14). STAT3<sup>pY705</sup> inhibition was neither not related to an upregulation of SOCS3,  
272 nor by an inhibition of IL-6R $\alpha$  (CD126). On the contrary, we observed a decrease of  
273 SOCS3 which can be attributed to the decrease of STAT3<sup>pY705</sup> signaling itself. Our  
274 results indicate an upregulation of JNK and ERK phosphorylation. These kinases,  
275 important for enterovirus viral progeny release (53-55) can also indirectly contribute to  
276 STAT3<sup>pY705</sup> downregulation (27-30), which suggest that induction of phosphorylated  
277 kinases JNK and ERK could contribute to STAT3<sup>pY705</sup> decrease and potentially plays also  
278 a role in the decrease of *Igf2* in MTE4-14 cells infected with CV-B4.

279 Together, these findings bring new knowledge of *Igf2* regulation by CV-B4 in the context  
280 of a thymic infection, and further support the idea that CV-B4 may disturb *Igf2* thymic  
281 presentation and decrease central tolerance to insulin.

282

## 283 **METHODS**

### 284 **Cells and virus**

285 The murine thymic epithelial cell line MTE4-14, of medullar origin, derived from C3H/J  
286 (*H-2<sup>k</sup>*) thymic neonatal lobes (13), was grown in complete high glucose Dulbecco's  
287 modified Eagle medium (DMEM; Gibco) supplemented with 10% heat-inactivated fetal  
288 calf serum (FCS; Gibco), 2 mM L-glutamine (Gibco), 0.1 µg/mL epidermal growth factor  
289 (EGF; Sigma-Aldrich), 100 U/mL penicillin and 100 µg/mL streptomycin (Gibco) (13, 14).  
290 VERO cells (kindly provided by the Laboratory of Virology and Immunology, Giga,  
291 university of Liège) were grown in DMEM high glucose supplemented with 10% FCS,  
292 100 U/mL penicillin and 100 µg/mL streptomycin. CV-B4 E2, the diabetogenic strain of  
293 coxsackievirus B4, (kindly provided by Ji-Won Yoon, Julia McFarlane Diabetes Research  
294 Center, Calgary, Alberta, Canada) was propagated in Hela cell line in DMEM high  
295 glucose supplemented with 10% FCS. Supernatants were collected 4 days after  
296 inoculation, after three freeze/thaw cycles then clarified by centrifugation at 2,500 × g for  
297 10 min, filtered and stored at -80 °C.

### 298 **Mice inoculation and infection by CV-B4 E2**

299 For *in vivo* experiment, 4–6 weeks old Swiss Albino female mice were used (Janvier  
300 Laboratories). Mice were inoculated by intraperitoneal route with either 100 µL of sterile  
301 DPBS (DPBS, Dulbecco's Phosphate-Buffered Saline, Thermo Fisher Scientific) for  
302 mock-infected mice or with 100 µL of CV-B4 E2 diluted in sterile DPBS at 1.10<sup>6</sup>  
303 TCID<sub>50</sub>/mL. Mice were grouped with a maximum of six per cage, checked and weighted  
304 daily. Mice were treated according to general ethic rules with unlimited access to food  
305 and water. Six infected and mock-infected animals were sacrificed 2, 3 and 7 days P.I.

306 From each animal, thymus and pancreas were collected. All procedures were approved  
307 by the university hospital of Liège ethics committee (Protocol n°13-1611).

### 308 **TEC isolation, enrichment and immunostaining**

309 Protocol was carried out as previously described (16). Briefly, thymus lobes were cut in  
310 small pieces and cleaned for blood and connective tissue in RPMI (Lonza) supplemented  
311 with 10% FCS, 2 mM L-glutamine and 100 U/mL penicillin and 100 µg/mL streptomycin  
312 (Gibco). Thymic fragments were washed in RPMI 2% FCS and digested 15 min at 37 °C  
313 in 500 µg/mL Liberase TL (Sigma-Aldrich) and 111 µg/mL DNase I from bovine pancreas  
314 (Sigma-Aldrich). Thymic fragments were mixed in the beginning and in the end of  
315 enzymatic digestion. Resulting supernatant was incubated 5 min on ice in DPBS  
316 supplemented with 1% FCS and 5 mM EDTA pH7.3. Complete RPMI was added on  
317 supernatant and the thymic cell suspension was centrifuged and filtered. Fifty million cells  
318 were used for TECs enrichment with mouse CD45 microbeads (Miltenyi Biotec)  
319 according to the manufacturer's protocol. For immunostaining, CD45<sup>-</sup> enriched cells  
320 (TECs) and total thymic suspension was incubated with anti-CD16/CD32 Fc block 1:50  
321 (clone 93, eBioscience) during 15 min at 4 °C in MACS buffer followed by incubation with  
322 anti-CD45 1:100 (clone 30F-11, BD biosciences), anti-EpCAM 1:100 (clone G8.8,  
323 eBioscience) during 30 min. Samples were analyzed on a FACSCanto flow cytometer  
324 (BD biosciences) and the raw data analyzed with FlowJo software (Treestar). Purity of  
325 CD45 negative sorted cells was in average 80% (data not shown). Aliquots of total thymic  
326 cells (digested unsorted cells) were stored for protein and RNA extraction, aliquots of  
327 CD45<sup>-</sup> isolated cells were stored for RNA extraction.

328



## 329 **Infection of MTE4-14 by CV-B4 E2**

330 MTE4-14 cells were seeded at 150,000 cells per well on 6-well culture plates in DMEM  
331 high glucose supplemented with 10% heat-inactivated FCS, 2 mM L-glutamine, 0.1  
332 µg/mL EGF and incubated overnight at 37 °C. The culture medium was then removed  
333 and cells were inoculated with 500 µL per well of CV-B4 E2 in DMEM only with a  
334 multiplicity of infection (MOI) of 0.05. The MOI is defined by the formula:

$$335 \quad MOI = \frac{\text{Volume of inoculum (mL)} * \text{viral titer} \left( \frac{TCID_{50}}{mL} \right) * 0.8}{\text{Number of cells per well}}$$

336 Alternatively,  $2.10^4$  MTE4-14 cells were seeded on 96-well culture plates flat bottom and  
337 were inoculated with 100 µL per well with various MOI ranging from 0.05 to 5. One well  
338 served as control for cell count before infection, allowing similar MOI between  
339 experiments. Mock-infected cells served as negative control and were treated under  
340 same conditions for all experiments, except inoculation with DMEM alone. After 90 min of  
341 incubation cells were washed with DMEM alone, and incubated with complete DMEM  
342 without antibiotics for 3 days. At 1 to 3 days P.I., one plate was stopped and processed  
343 as follow: culture supernatants were removed and stored at -20 °C for CV-B4 E2 titration,  
344 cells were washed, scrapped in PBS then were processed for RNA or protein extraction.

## 345 **Modified TCID<sub>50</sub> titration assay**

346 CV-B4 E2 virus titer was determined on VERO cells by a modified Reed and Muench  
347 limiting dilution assay as previously described (56, 57). Briefly, after an incubation of 7  
348 days with CV-B4 E2 dilutions, cells were incubated during 3 hrs with MTT reagent  
349 (Sigma-Aldrich), then formazan was dissolved in DMSO and absorbance was measured  
350 at 550 nm. TCID<sub>50</sub> values (limiting dilution corresponding to 50% of viability) were

351 obtained by the use of the  $V_{50}$  parameter of Boltzmann sigmoid function.

## 352 **Flow cytometry**

353 For MTE4-14 flow cytometry analysis, cells were harvested with EDTA 5 mM in DPBS  
354 during 15 min at 37 °C, washed with 10% FBS before addition of Fc block as described  
355 above. MTE4-14 cells were then stained with anti-mouse CD126 APC 1:40 (D7715A7,  
356 Biolegend) or with APC rat IgG2b,  $\kappa$  isotype control (Biolegend).

## 357 **Reverse transcription, end point PCR and real-time quantitative PCR**

358 Total RNA was extracted with Nucleospin RNA kit (Machery Nagel) according to  
359 manufacturer's instructions. Alternatively, RNA was extracted with TRIzol Reagent  
360 (Ambion) following manufacturer's instructions. If TRIzol was used, contaminating DNA  
361 was eliminated with 2 U of DNase Turbo (Ambion) during 30 min at 37 °C, followed by  
362 RNA re-extraction with phenol chloroform. RNA concentration was measured on  
363 Nanodrop ND-1000 (Thermo Fisher Scientific).  $A_{260/280}$  ratio upper than 1.8 were  
364 considered as acceptable. Reverse transcription was performed using 200-500 ng of  
365 total RNA in the Transcriptor First Strand cDNA synthesis kit (Roche) with 60  $\mu$ M random  
366 hexamer and 6.25  $\mu$ M oligo(dT)<sub>18</sub> primer. Reverse transcriptase minus control was used  
367 as control for DNA contamination. End Point PCR were realized on an iCycler Thermal  
368 Cycler (Bio-Rad) in the presence of GoTaq G2 polymerase (Promega) in 25  $\mu$ L  
369 containing 10-25 ng cDNA, 200  $\mu$ M dNTPs, 200 nM of each forward and reverse primer,  
370 25 mM MgCl<sub>2</sub>, 1X Green Buffer and 0.625 U of GoTaq G2 polymerase. The PCR  
371 parameters were: one cycle at 95 °C for 2 min; 35 cycles with denaturation at 95 °C for  
372 30 s, annealing at 60 °C for 30 s and elongation at 72 °C for 30 s; one cycle at 72 °C for  
373 5 min. PCR products were visualized on agarose gel. Real time PCR was performed

374 using Takyon No Rox Sybr 2X masterMix blue dTTp (Eurogentec) with 200 nM of each  
375 primer on an iCycler iQ(Bio-Rad). qPCR parameters were: initial denaturation at 95 °C for  
376 10 min; 40 cycles with denaturation at 95 °C for 10 s, annealing at 60 °C for 30 s and  
377 amplification at 72 °C for 25 s. Each qPCR reaction was ended by a melting curve with a  
378 ramp of 0.5 °C from 55 to 95 °C to control single PCR product amplification. A negative  
379 template control for each gene was included in the plate for each mix. Gene expression  
380 values were calculated based on the comparative Ct normalized to *Hprt* and displayed as  
381 fold change to mock ( $2^{-\Delta\Delta Ct}$ ) or in relative value ( $2^{-\Delta Ct}$ ). Primers (**Table 3-1**) were double  
382 checked with PRIMER-BLAST.

### 383 **One-step CV-B4 E2 RNA detection and two-step CV-B4 E2 RNA detection by** 384 **PCR**

385 One-step RT-PCR was realized with the SuperScript III One-Step RT-PCR System with  
386 Platinum Taq DNA Polymerase (Thermo Fisher Scientific) on an iCycler Thermal Cycler  
387 (Bio-Rad). Reactions were performed following manufacturer's instruction containing  
388 500 ng of RNA, 100 nM of 007 and 008 primers. RT-PCR parameters were: one step 50  
389 °C 30 min for cDNA synthesis, followed by one cycle at 94 °C 2 min for initial  
390 denaturation; 38 cycles with one cycle 94 °C for 30 s, annealing at 60 °C and extension at  
391 68 °C for 30 s and a final extension at 72 °C for 10 min. PCR products were visualized on  
392 agarose gel (1.5%). In case of negative amplification, PCR product was run for a  
393 semi-nested PCR for 35 cycles in the presence of Gotaq G2 DNA polymerase as  
394 described above. For two-step CV-B4 E2 RNA detection, reverse transcription was  
395 performed as described above in 10 µL with 1 µM reverse primer 007  
396 (5' -ATTGTCACCATAAGCAGCCA-3') for positive strand of CV-B4 E2 or 1 µM forward

397 primer 008 (5' -GAGTATCAATAAGCTGCTTG-3') for negative strand detection of CV-B4  
398 E2. PCR amplification was performed then with 100 nM of 007 and 008 primers. PCR  
399 parameters were: one cycle at 95 °C for 2 min; 25 cycles with denaturation at 95 °C for 30  
400 s, annealing at 60 °C and extension at 72 °C for 30 s. PCR was ended 5 min at 72 °C.  
401 PCR products were analyzed on agarose gel and give a PCR product of 412 bp.  
402 Negative PCR was run for semi-nested PCR with internal primer 006  
403 (5' -TCCTCCGGCCCCTGAATGCG-3') and 007. PCR parameters were: one cycle at 95 °C  
404 for 2 min; 35 cycles with denaturation at 95 °C for 30 s, annealing at 60 °C and extension  
405 at 72 °C for 30 s. PCR was ended 5 min at 72 °C. Semi-nested PCR product size is 155  
406 bp.

#### 407 ***Igf2* P3 Nluc plasmid construction and site-directed mutagenesis**

408 The 342 bp *Igf2* P3 promoter sequence (**Fig. 4A**), containing the proximal promoter of the  
409 murine *Igf2* P3 (58, 59) was synthesized by the GeneArt Gene Synthesis service (Thermo  
410 Fisher Scientific). TSS sequence was localized with EPD database (60), *Igf2* P3  
411 promoter sequence was then cloned in the Nanoluciferase expressing plasmid pNL1.2  
412 NlucP plasmid (Promega) by the use of restriction site *NheI* (5') and *EcoRV* (3') in *Igf2* P3  
413 promoter by the GeneArt Gene Synthesis service. The resulting plasmid was called *Igf2*  
414 *P3* Nluc. Site-directed mutagenesis or promoter deletions were performed with the Q5  
415 Site-Directed Mutagenesis Kit (New England Biolabs). PCR reactions were done in 50 µL  
416 containing 25 µL of Q5 Hot Start High-Fidelity 2X Master Mix, 500 nM of each forward  
417 and reverse primer (**Table 3-2**) and 50 ng of plasmid. The PCR parameters were: one  
418 cycle at 98 °C for 30 s; 25 cycles with denaturation step 98 °C for 10 s, annealing (**Table**  
419 **3-2**) for 30 s and extension step at 72 °C for 150 s and ended at 72 °C for 2 min. Three

420 annealing temperature were performed in parallel for each primer set. PCR products  
421 were loaded on 1% agarose gel with Orange DNA Loading Dye 6X (Thermo Fisher  
422 Scientific). SYBR safe (Thermo Fisher Scientific) was added on agarose gel at 1:10,000  
423 for DNA visualization. When single PCR product was detected, KLD mix was added on  
424 PCR reaction. Briefly, the KLD reaction contains 2.5  $\mu$ L 2X KLD buffer, 1  $\mu$ L of Enzyme  
425 Mix, 0.5  $\mu$ L of PCR product and 0.5  $\mu$ L of nuclease-free water. Five  $\mu$ L of KLD reaction  
426 were mixed with 25  $\mu$ L of *Escherichia coli* DH5 $\alpha$  chemocompetent strain and transformed  
427 45 s at 42 °C. Transformed bacteria were selected on agar plate containing ampicillin at  
428 100  $\mu$ g/ml. Plasmids were extracted with NucleoSpin Plasmid Transfection-grade  
429 (Machery-Nagel) and concentration were measured on Nanodrop ND-1000 (Thermo  
430 Fisher Scientific). All plasmids were sequenced by Sanger method (Giga-Genomics).

#### 431 **Transfection and dual luciferase reporter assay on MTE4-14 cell line**

432 Plasmid transfection was performed in 96-well plate. Briefly, each reaction contained 20  
433  $\mu$ L of 100 ng of pGL3 plasmid (Promega), mixed with 100 ng *Igf2* P3 Nluc (or empty  
434 vector or constructs obtained from *Igf2* P3 Nluc), 0.5  $\mu$ L of Genius DNA transfection  
435 Reagent (Westburg) diluted in DMEM. Mix were added directly on  $2 \cdot 10^4$  cells/well in a  
436 96-well plate during the seeding. After an overnight incubation at 37 °C, cells were then  
437 infected by CV-B4 E2 or DMEM only as described above. Cells were infected during a  
438 maximum of two days. Nanoluciferase activity and firefly luciferase activity, were  
439 analyzed by the Nano-Glo Dual-Luciferase Reporter Assay System (Promega) following  
440 manufacturer's instructions. Bioluminescence was analyzed with a FilterMax F5  
441 (Molecular Devices). Normalized luciferase activity was calculated as the ratio of the  
442 Nanoluciferase activity to the firefly luciferase for each sample, then normalized to empty

443 vector for mock uninfected cells and for CV-B4 E2 infected cells. In each experiment,  
444 relative mock value was then set up to 100%.

#### 445 **mRNA stability assay**

446 Actinomycin D (Sigma-Aldrich) was prepared at 1 mg/mL in ethanol and used at 5 µg/mL.  
447 mRNA half-life of *Igf2 V3* was estimated by linear regression in each experiment from  
448 *Igf2 V3* relative value ( $2^{-\Delta Ct}$ ) (normalized to value of vehicle control for each time point)  
449 with the formula  $2^{-\Delta Ct(Igf2V3-Hpr)} = f(\text{time of actinomycin D treatment})$  for mock or  
450 CV-B4 E2 infected cells.

#### 451 **SDS-PAGE and Western Blot**

452 Proteins were extracted in RIPA buffer supplemented with protease and phosphatase  
453 inhibitor mini tablets cocktail (Pierce) and stored at -20 °C for further use. Protein extracts  
454 were quantified with BCA protein assay kit (Pierce) and denatured at 95 °C during 5 min  
455 in Laemmli buffer supplemented with β-mercaptoethanol. Ten µg (or fifty µg for IGF2  
456 detection) of protein lysates were separated on 12% SDS-PAGE gel then transferred to  
457 PVDF membrane (Amersham). Transfer was performed at 4 °C during 90 min at 80 V in  
458 transfer buffer containing 25 mM Tris, 192 mM glycine and 20% (v/v) methanol. Prior to  
459 immunoblotting, membranes were blocked in blocking buffer (5% w/v BSA in TBS-T)  
460 during 1 hr at room temperature and primary antibodies (**Table 4**) diluted in blocking  
461 buffer were added for overnight at 4 °C. Membranes were then washed three times with  
462 TBS-T followed by incubation during 1 hr at room temperature with anti-rabbit or  
463 anti-mouse secondary antibody coupled to HRP (all from Cell signaling) diluted at  
464 1:1,000 in blocking buffer. Membranes were then washed three times in TBS-T.  
465 Chemiluminescence was visualized with the Pierce ECL Western Blotting Substrate

466 (Pierce) and acquired on ImageQuant LAS4000 (GE Healthcare). Quantification of band  
467 intensity was performed with the ImageJ software. GAPDH or  $\beta$  tubulin was used as  
468 loading control and for relative quantification. Positive control for mature IGF2 detection  
469 was 500 ng of recombinant mouse IGF2 (R&D Systems).

#### 470 **Statistical analyses**

471 Statistical analyses were performed with GraphPad Prism 8.0. Unpaired *t* test and ratio  
472 paired *t* test were used to compare differences between groups, respectively for *in vivo*  
473 and *in vitro* experiments. One-way ANOVA was used to compare differences between  
474 time points for *in vivo* and *in vitro* experiments. *P* values inferior or equal at 0.05 were  
475 considered significant.

476

477 **CONFLICTS OF INTEREST**

478 The authors declare that they have no conflict of interests.

479  
480 **ACKNOWLEDGEMENTS**

481 This work was supported by doctoral grants obtained from the Fund of Scientific  
482 Research (FSR and FRIA of Belgium), by Erasmus+, and by the Fonds Léon Fredericq of  
483 Liège University Hospital. The funders had no role in study design, data collection and  
484 interpretation, or the decision to submit the work for publication. We thank animal  
485 facilities, flow cytometry and also viral vectors platforms from the Institute of Research  
486 GIGA at the University of Liège.

487



488 **REFERENCES**

- 489
- 490 1. Geenen V, Trussart C, Michaux H, Halouani A, Jaidane H, Collee C, Renard C,  
491 Daukandt M, Ledent P, Martens H. 2019. The presentation of neuroendocrine  
492 self-peptides in the thymus: an essential event for individual life and vertebrate  
493 survival. *Ann N Y Acad Sci* doi:10.1111/nyas.14089.
  - 494 2. Kecha-Kamoun O, Achour I, Martens H, Collette J, Lefebvre PJ, Greiner DL, Geenen  
495 V. 2001. Thymic expression of insulin-related genes in an animal model of autoimmune  
496 type 1 diabetes. *Diabetes Metab Res Rev* 17:146-52.
  - 497 3. Hansenne I, Renard-Charlet C, Greimers R, Geenen V. 2006. Dendritic cell  
498 differentiation and immune tolerance to insulin-related peptides in *Igf2*-deficient mice. *J*  
499 *Immunol* 176:4651-7.
  - 500 4. Hober D, Sauter P. 2010. Pathogenesis of type 1 diabetes mellitus: interplay between  
501 enterovirus and host. *Nat Rev Endocrinol* 6:279-89.
  - 502 5. Yoon JW, Austin M, Onodera T, Notkins AL. 1979. Isolation of a virus from the  
503 pancreas of a child with diabetic ketoacidosis. *N Engl J Med* 300:1173-9.
  - 504 6. Bopegamage S, Borsanyiova M, Vargova A, Petrovicova A, Benkovicova M, Gomolcak  
505 P. 2003. Coxsackievirus infection of mice. I. Viral kinetics and histopathological  
506 changes in mice experimentally infected with coxsackieviruses B3 and B4 by oral  
507 route. *Acta Virol* 47:245-51.
  - 508 7. Bopegamage S, Kovacova J, Vargova A, Motusova J, Petrovicova A, Benkovicova M,  
509 Gomolcak P, Bakkers J, van Kuppeveld F, Melchers WJ, Galama JM. 2005. Coxsackie  
510 B virus infection of mice: inoculation by the oral route protects the pancreas from  
511 damage, but not from infection. *J Gen Virol* 86:3271-80.
  - 512 8. Chatterjee NK, Hou J, Dockstader P, Charbonneau T. 1992. Coxsackievirus B4  
513 infection alters thymic, splenic, and peripheral lymphocyte repertoire preceding onset  
514 of hyperglycemia in mice. *J Med Virol* 38:124-31.

- 515 9. Jaidane H, Gharbi J, Lobert PE, Lucas B, Hiar R, M'Hadheb M B, Brilot F, Geenen V,  
516 Aouni M, Hober D. 2006. Prolonged viral RNA detection in blood and lymphoid tissues  
517 from coxsackievirus B4 E2 orally-inoculated Swiss mice. *Microbiol Immunol* 50:971-4.
- 518 10. Brilot F, Geenen V, Hober D, Stoddart CA. 2004. Coxsackievirus B4 infection of  
519 human fetal thymus cells. *J Virol* 78:9854-61.
- 520 11. Brilot F, Jaidane H, Geenen V, Hober D. 2008. Coxsackievirus B4 infection of  
521 murine foetal thymus organ cultures. *J Med Virol* 80:659-66.
- 522 12. Brilot F, Chehadeh W, Charlet-Renard C, Martens H, Geenen V, Hober D. 2002.  
523 Persistent infection of human thymic epithelial cells by coxsackievirus B4. *J Virol*  
524 76:5260-5.
- 525 13. Lepesant H, Pierres M, Naquet P. 1995. Deficient antigen presentation by thymic  
526 epithelial cells reveals differential induction of T cell clone effector functions by  
527 CD28-mediated costimulation. *Cell Immunol* 161:279-87.
- 528 14. Jaidane H, Caloone D, Lobert PE, Sane F, Dardenne O, Naquet P, Gharbi J, Aouni  
529 M, Geenen V, Hober D. 2012. Persistent infection of thymic epithelial cells with  
530 coxsackievirus B4 results in decreased expression of type 2 insulin-like growth factor. *J*  
531 *Virol* 86:11151-62.
- 532 15. Roberts NA, Adams BD, McCarthy NI, Tooze RM, Parnell SM, Anderson G, Kaech  
533 SM, Horsley V. 2017. Prdm1 Regulates Thymic Epithelial Function To Prevent  
534 Autoimmunity. *J Immunol* 199:1250-1260.
- 535 16. Xing Y, Hogquist KA. 2014. Isolation, identification, and purification of murine  
536 thymic epithelial cells. *J Vis Exp* doi:10.3791/51780:e51780.
- 537 17. Bergman D, Halje M, Nordin M, Engstrom W. 2013. Insulin-like growth factor 2 in  
538 development and disease: a mini-review. *Gerontology* 59:240-9.
- 539 18. Bok K, Prikhodko VG, Green KY, Sosnovtsev SV. 2009. Apoptosis in murine  
540 norovirus-infected RAW264.7 cells is associated with downregulation of survivin. *J*

541 Virol 83:3647-56.

542 19. Chau DH, Yuan J, Zhang H, Cheung P, Lim T, Liu Z, Sall A, Yang D. 2007.  
543 Coxsackievirus B3 proteases 2A and 3C induce apoptotic cell death through  
544 mitochondrial injury and cleavage of eIF4GI but not DAP5/p97/NAT1. *Apoptosis*  
545 12:513-24.

546 20. Wang Y, Zhao S, Chen Y, Wang T, Dong C, Wo X, Zhang J, Dong Y, Xu W, Feng  
547 X, Qu C, Wang Y, Zhong Z, Zhao W. 2019. The Capsid Protein VP1 of Coxsackievirus  
548 B Induces Cell Cycle Arrest by Up-Regulating Heat Shock Protein 70. *Front Microbiol*  
549 10:1633.

550 21. Weirauch MT, Yang A, Albu M, Cote AG, Montenegro-Montero A, Drewe P,  
551 Najafabadi HS, Lambert SA, Mann I, Cook K, Zheng H, Goity A, van Bakel H, Lozano  
552 JC, Galli M, Lewsey MG, Huang E, Mukherjee T, Chen X, Reece-Hoyes JS,  
553 Govindarajan S, Shaulsky G, Walhout AJM, Bouget FY, Ratsch G, Larrondo LF, Ecker  
554 JR, Hughes TR. 2014. Determination and inference of eukaryotic transcription factor  
555 sequence specificity. *Cell* 158:1431-1443.

556 22. Wang K, Wang C, Xiao F, Wang H, Wu Z. 2008. JAK2/STAT2/STAT3 are required  
557 for myogenic differentiation. *J Biol Chem* 283:34029-36.

558 23. Lee SC, Min HY, Jung HJ, Park KH, Hyun SY, Cho J, Woo JK, Kwon SJ, Lee HJ,  
559 Johnson FM, Lee HY. 2016. Essential role of insulin-like growth factor 2 in resistance  
560 to histone deacetylase inhibitors. *Oncogene* 35:5515-5526.

561 24. Durant L, Watford WT, Ramos HL, Laurence A, Vahedi G, Wei L, Takahashi H,  
562 Sun HW, Kanno Y, Powrie F, O'Shea JJ. 2010. Diverse targets of the transcription  
563 factor STAT3 contribute to T cell pathogenicity and homeostasis. *Immunity* 32:605-15.

564 25. Carow B, Rottenberg ME. 2014. SOCS3, a Major Regulator of Infection and  
565 Inflammation. *Front Immunol* 5:58.

566 26. Akhtar LN, Benveniste EN. 2011. Viral exploitation of host SOCS protein functions.

567 J Virol 85:1912-21.

568 27. Wakahara R, Kunimoto H, Tanino K, Kojima H, Inoue A, Shintaku H, Nakajima K.  
569 2012. Phospho-Ser727 of STAT3 regulates STAT3 activity by enhancing  
570 dephosphorylation of phospho-Tyr705 largely through TC45. *Genes Cells* 17:132-45.

571 28. Lim CP, Cao X. 1999. Serine phosphorylation and negative regulation of Stat3 by  
572 JNK. *J Biol Chem* 274:31055-61.

573 29. Gkouveris I, Nikitakis N, Karanikou M, Rassidakis G, Sklavounou A. 2014. Erk1/2  
574 activation and modulation of STAT3 signaling in oral cancer. *Oncol Rep* 32:2175-82.

575 30. Gkouveris I, Nikitakis N, Karanikou M, Rassidakis G, Sklavounou A. 2016. JNK1/2  
576 expression and modulation of STAT3 signaling in oral cancer. *Oncol Lett* 12:699-706.

577 31. Kecha O, Martens H, Franchimont N, Achour I, Hazee-Hagelstein MT,  
578 Charlet-Renard C, Geenen V, Winkler R. 1999. Characterization of the insulin-like  
579 growth factor axis in the human thymus. *J Neuroendocrinol* 11:435-40.

580 32. Kemball CC, Harkins S, Whitmire JK, Flynn CT, Feuer R, Whitton JL. 2009.  
581 Coxsackievirus B3 inhibits antigen presentation in vivo, exerting a profound and  
582 selective effect on the MHC class I pathway. *PLoS Pathog* 5:e1000618.

583 33. Shiu RP, Paterson JA. 1988. Characterization of insulin-like growth factor II  
584 peptides secreted by explants of neonatal brain and of adult pituitary from rats.  
585 *Endocrinology* 123:1456-60.

586 34. Qiu Q, Basak A, Mbikay M, Tsang BK, Gruslin A. 2005. Role of pro-IGF-II  
587 processing by proprotein convertase 4 in human placental development. *Proc Natl*  
588 *Acad Sci U S A* 102:11047-52.

589 35. St-Pierre C, Brochu S, Vanegas JR, Dumont-Lagace M, Lemieux S, Perreault C.  
590 2013. Transcriptome sequencing of neonatal thymic epithelial cells. *Sci Rep* 3:1860.

591 36. Aguech-Oueslati L, Jaidane H, Sane F, Jrad-Battikh N, Hamed SB, Hober D,

- 592 Gharbi J. 2018. Evaluation of Contamination Risks with Coxsackievirus B4 E2 in Swiss  
593 Albino Mice Stools. *Curr Microbiol* 75:32-39.
- 594 37. Klingel K, Stephan S, Sauter M, Zell R, McManus BM, Bultmann B, Kandolf R.  
595 1996. Pathogenesis of murine enterovirus myocarditis: virus dissemination and  
596 immune cell targets. *J Virol* 70:8888-95.
- 597 38. Matteucci D, Toniolo A, Conaldi PG, Basolo F, Gori Z, Bendinelli M. 1985.  
598 Systemic lymphoid atrophy in coxsackievirus B3-infected mice: effects of virus and  
599 immunopotentiating agents. *J Infect Dis* 151:1100-8.
- 600 39. Der SD, Zhou A, Williams BR, Silverman RH. 1998. Identification of genes  
601 differentially regulated by interferon alpha, beta, or gamma using oligonucleotide  
602 arrays. *Proc Natl Acad Sci U S A* 95:15623-8.
- 603 40. van Koetsveld PM, Vitale G, Feelders RA, Waaijers M, Sprij-Mooij DM, de Krijger  
604 RR, Speel EJ, Hofland J, Lamberts SW, de Herder WW, Hofland LJ. 2013.  
605 Interferon-beta is a potent inhibitor of cell growth and cortisol production in vitro and  
606 sensitizes human adrenocortical carcinoma cells to mitotane. *Endocr Relat Cancer*  
607 20:443-54.
- 608 41. Vitale G, van Koetsveld PM, de Herder WW, van der Wansem K, Janssen JA,  
609 Colao A, Lombardi G, Lamberts SW, Hofland LJ. 2009. Effects of type I interferons on  
610 IGF-mediated autocrine/paracrine growth of human neuroendocrine tumor cells. *Am J*  
611 *Physiol Endocrinol Metab* 296:E559-66.
- 612 42. Yang K, Puel A, Zhang S, Eidenschenk C, Ku CL, Casrouge A, Picard C, von  
613 Bernuth H, Senechal B, Plancoulaine S, Al-Hajjar S, Al-Ghonaium A, Marodi L,  
614 Davidson D, Speert D, Roifman C, Garty BZ, Ozinsky A, Barrat FJ, Coffman RL, Miller  
615 RL, Li X, Lebon P, Rodriguez-Gallego C, Chapel H, Geissmann F, Jouanguy E,  
616 Casanova JL. 2005. Human TLR-7-, -8-, and -9-mediated induction of IFN-alpha/beta  
617 and -lambda is IRAK-4 dependent and redundant for protective immunity to viruses.  
618 *Immunity* 23:465-78.

- 619 43. Erbay E, Park IH, Nuzzi PD, Schoenherr CJ, Chen J. 2003. IGF-II transcription in  
620 skeletal myogenesis is controlled by mTOR and nutrients. *J Cell Biol* 163:931-6.
- 621 44. Asfari M, De W, Noel M, Holthuisen PE, Czernichow P. 1995. Insulin-like growth  
622 factor-II gene expression in a rat insulin-producing beta-cell line (INS-1) is regulated  
623 by glucose. *Diabetologia* 38:927-35.
- 624 45. Lee YI, Kim SJ. 1996. Transcriptional repression of human insulin-like growth  
625 factor-II P4 promoter by Wilms' tumor suppressor WT1. *DNA Cell Biol* 15:99-104.
- 626 46. Wen X, Liu H, Xiao G, Liu X. 2011. Downregulation of the transcription factor KLF4  
627 is required for the lineage commitment of T cells. *Cell Res* 21:1701-10.
- 628 47. An J, Golech S, Klaewsongkram J, Zhang Y, Subedi K, Huston GE, Wood WH,  
629 3rd, Wersto RP, Becker KG, Swain SL, Weng N. 2011. Kruppel-like factor 4 (KLF4)  
630 directly regulates proliferation in thymocyte development and IL-17 expression during  
631 Th17 differentiation. *FASEB J* 25:3634-45.
- 632 48. Carlson CM, Endrizzi BT, Wu J, Ding X, Weinreich MA, Walsh ER, Wani MA,  
633 Lingrel JB, Hogquist KA, Jameson SC. 2006. Kruppel-like factor 2 regulates thymocyte  
634 and T-cell migration. *Nature* 442:299-302.
- 635 49. Lomada D, Jain M, Bolner M, Reeh KA, Kang R, Reddy MC, DiGiovanni J, Richie  
636 ER. 2016. Stat3 Signaling Promotes Survival And Maintenance Of Medullary Thymic  
637 Epithelial Cells. *PLoS Genet* 12:e1005777.
- 638 50. Satoh R, Kakugawa K, Yasuda T, Yoshida H, Sibilina M, Katsura Y, Levi B,  
639 Abramson J, Koseki Y, Koseki H, van Ewijk W, Hollander GA, Kawamoto H. 2016.  
640 Requirement of Stat3 Signaling in the Postnatal Development of Thymic Medullary  
641 Epithelial Cells. *PLoS Genet* 12:e1005776.
- 642 51. Chang Z, Wang Y, Bian L, Liu Q, Long JE. 2017. Enterovirus 71 antagonizes the  
643 antiviral activity of host STAT3 and IL-6R with partial dependence on virus-induced  
644 miR-124. *J Gen Virol* 98:3008-3025.

- 645 52. Kiuchi N, Nakajima K, Ichiba M, Fukada T, Narimatsu M, Mizuno K, Hibi M, Hirano  
646 T. 1999. STAT3 is required for the gp130-mediated full activation of the c-myc gene. *J*  
647 *Exp Med* 189:63-73.
- 648 53. Luo H, Yanagawa B, Zhang J, Luo Z, Zhang M, Esfandiarei M, Carthy C, Wilson  
649 JE, Yang D, McManus BM. 2002. Coxsackievirus B3 replication is reduced by  
650 inhibition of the extracellular signal-regulated kinase (ERK) signaling pathway. *J*  
651 *Virol* 76:3365-73.
- 652 54. Si X, Luo H, Morgan A, Zhang J, Wong J, Yuan J, Esfandiarei M, Gao G, Cheung  
653 C, McManus BM. 2005. Stress-activated protein kinases are involved in coxsackievirus  
654 B3 viral progeny release. *J Virol* 79:13875-81.
- 655 55. Zhu M, Duan H, Gao M, Zhang H, Peng Y. 2015. Both ERK1 and ERK2 are  
656 required for enterovirus 71 (EV71) efficient replication. *Viruses* 7:1344-56.
- 657 56. Andersson P, Alm S, Edman K, Lindberg AM. 2005. A novel and rapid method to  
658 quantify cytolytic replication of picornaviruses in cell culture. *J Virol Methods*  
659 130:117-23.
- 660 57. Pourianfar HR, Javadi A, Grollo L. 2012. A colorimetric-based accurate method for  
661 the determination of enterovirus 71 titer. *Indian J Virol* 23:303-10.
- 662 58. Rotwein P, Hall LJ. 1990. Evolution of insulin-like growth factor II: characterization  
663 of the mouse IGF-II gene and identification of two pseudo-exons. *DNA Cell Biol*  
664 9:725-35.
- 665 59. Caricasole A, Ward A. 1993. Transactivation of mouse insulin-like growth factor II  
666 (IGF-II) gene promoters by the AP-1 complex. *Nucleic Acids Res* 21:1873-9.
- 667 60. Dreos R, Ambrosini G, Cavin Perier R, Bucher P. 2013. EPD and EPDnew,  
668 high-quality promoter resources in the next-generation sequencing era. *Nucleic Acids*  
669 *Res* 41:D157-64.
- 670

671 **FIGURE LEGENDS**

672

673 **Fig. 1 Effect of CV-B4 E2 on murine thymic *Igf2* mRNA isoforms and its precursors**

674 ***in vivo*.** (A) Schematic thymus processing for isolation of total thymic cells (unsorted

675 cells) and CD45<sup>-</sup> enriched cells (TECs). (B) Flow cytometry analysis of CD45 enriched

676 TECs (EpCAM<sup>+</sup>CD45<sup>-</sup>) *versus* unsorted total thymic population. Numbers indicate the

677 percentage of TECs population (C) Relative mRNA expression of *total Igf2* mRNA in

678 unsorted total thymic population and in matched enriched TECs fraction (CD45<sup>-</sup>). Mock

679 uninfected mice at day 2 P.I. were used; *n* = 6. (D) Relative mRNA expression of *Igf2* V3,

680 V1 and V2 mRNA transcripts isoforms in CD45<sup>-</sup> enriched TECs in mock uninfected mice

681 at day 3 P.I. For each sample, relative mRNA expression of *Igf2* transcripts isoforms was

682 normalized to the corresponding *total Igf2* mRNA expression; *n* = 6 (E) Relative mRNA

683 expression of *Igf2* mRNA isoforms in mock and in CV-B4 E2 infected mice;

684 box-and-whisker plots extend from minimum to maximum values, with lines at medians;

685 *n* = 5-6 (F) Left panel, representative Western blot of IGF2 and its precursors at day 7 P.I.

686 in mock (-) and in CV-B4 E2 infected mice (+). Independent biological samples are

687 represented. PC, purified mature IGF2. Right panel, relative quantification of pro-IGF2 in

688 mock and in CV-B4 E2 infected mice; histogram represents mean of relative value ± SD;

689 *n* = 3. (G) Representative agarose gel electrophoresis of one-step RT-PCR products of

690 CV-B4 E2 genome in digested thymus (total thymic cells) and in matched pancreas, in

691 CV-B4 E2 (+) or in mock uninfected mice (-). Independent biological samples are shown.

692 L, ladder; PC, MTE4-14 cells infected with CV-B4 E2. (C) Student's paired *t* test,

693 \*\**p* < 0.01 (E-F) Student's *t* test, \*\**p* < 0.01 and \**p* < 0.05; (D; F) one-way ANOVA,

694 \*\**p* < 0.01; #*p* < 0.05.



695 **Fig. 2 *Igf2* mRNA isoforms expression in MTE4-14 cell line. (A)** RT-PCR of *Igf2* V1 (90  
696 bp), *Igf2* V2 (98 bp), *Igf2* V3 (68 bp), *total Igf2* (107 bp). Mock sample from 2 independent  
697 experiments are represented, murine brain is used as positive control. **(B)** Relative mRNA  
698 expression of *Igf2* V1 and *Igf2* V3 ( $n = 6$ ); relative expression was normalized to *Hprt* with  
699  $E^{-\Delta C_t}$  formula (with E represents efficiency amplification for *Igf2* V3 and *Igf2* V1);  
700 box-and-whisker plots extend from minimum to maximum values with lines at medians.  
701 Student *t* test,  $*p < 0.05$ .

702 **Fig. 3 Effect of CV-B4 E2 on *Igf2* at mRNA and its precursors on MTE4-14. (A)** Fold  
703 change of mRNA expression of *Igf2* transcripts in CV-B4 E2  $MOI = 0.05$  infected cells relative  
704 to matched mock uninfected cells ( $n = 6-12$ ); mock samples are represented as a dashed  
705 line set at  $y = 1$ ; box-and-whisker plots (CV-B4 E2  $MOI = 0.05$  infected cells) extend from  
706 minimum to maximum values, with lines at medians.**(B)** Fold change mRNA expression of  
707 *Tp53*, *Birc5* and *Bax* in CV-B4 E2  $MOI = 0.05$  infected cells relative to matched mock  
708 uninfected cells at day 3 P.I. Mock samples are represented as a dashed line set at  $y = 1$ ;  
709 data are represented as mean of fold change  $\pm$  SEM;  $n = 3$  **(C)** Left panel, Western blot  
710 analysis of IGF2 and its precursors in CV-B4 E2 infected cells (+) and in mock uninfected  
711 cells (-). PC, purified mature IGF2. Right panel, relative quantification of pro-IGF2 in  
712 CV-B4 E2  $MOI = 0.05$  infected cells (grey histograms) normalized to matched mock  
713 uninfected cells (white histograms) ( $n = 3$ ); histogram represents mean of fold change  $\pm$   
714 SEM. **(D)** Representative agarose gel electrophoresis of amplicons specific to the positive  
715 and negative strands of CV-B4 E2 genome (155 bp), amplified by semi-nested strand  
716 specific RT-PCR, from CV-B4 E2  $MOI = 0.05$  infected MTE4-14 cells; mock samples served  
717 as negative control. **(E)** Representative Western blot analysis of VP1 in CV-B4 E2  $MOI = 0.05$

718 infected MTE4-14 cells (+) or mock uninfected cells (-). Data are representative of three  
719 independent experiments. (F) Viral titer of CV-B4 E2<sub>MOI = 0.05</sub> in MTE4-14 infected cells.  
720 Mean of TCID<sub>50</sub>/mL ± SEM ( $n = 3-5$ ) are shown. (A-C) ratio paired  $t$  test, \*\*\* $p < 0.001$  and  
721 \* $p < 0.05$ ; (A, C) one-way ANOVA, # $p < 0.05$ ; (F) Kruskal-Wallis test, ### $p < 0.001$ .

722 **Fig. 4 Effect of CV-B4 E2 on *Igf2* P3 promoter activity in MTE4-14 and on *Igf2***  
723 **transcript stability.** (A) Sequence of the murine *Igf2* P3 promoter sequence (-168/+175)  
724 <https://epd.epfl.ch>. The restriction site *NheI* and *EcoRV* are indicated above in italic. The  
725 transcription start site is represented by an arrow at +1. (B) Nanoluciferase relative  
726 activity of *Igf2* P3 promoter (-168/+175) after 1 (left panel) and 2 days P.I. (right panel).  
727 Analysis was realized as described in methods. Mean of relative dual-luciferase activity  
728 normalized to mock are represented ± SEM. (C) mRNA half-life of *Igf2* V3 transcripts in  
729 CV-B4 E2<sub>MOI = 0.05</sub> or mock uninfected cells at day 2 P.I. followed by 2-10 hours of  
730 treatment with actinomycin D ( $n = 4$ ), vehicle control was used for data normalization for  
731 each time point. (B-C) ratio paired  $t$  test, \*\*\* $p < 0.001$  and \* $p < 0.05$ ; (B) one-way ANOVA,  
732 # $p < 0.05$ .

733 **Fig. 5 Deletion analysis of *Igf2* P3 promoter in MTE4-14 cells infected with CV-B4 E2**  
734 **MOI = 0.05.** (A) Schematic representation of the *Igf2* P3 promoter constructs in  
735 Nanoluciferase vector. (B-C) Nanoluciferase relative activity of *Igf2* P3 promoter  
736 constructs at day 2 P.I. in CV-B4 E2<sub>MOI = 0.05</sub> or in mock uninfected cells, transfected by  
737 the indicated *Igf2* P3 promoter construct. Mean of relative dual-luciferase activity  
738 normalized to mock are represented ± SEM. Mock uninfected cells transfected by the full  
739 *Igf2* P3 promoter (-168/+175) is set at 100% in each experiment ( $n = 4-16$ ).  
740 Ratio paired  $t$  test, \* $p < 0.05$ , \*\*\* $p < 0.001$ .

741 **Fig. 6 Effect of CV-B4 E2 on STAT3 phosphorylation and on STAT3 signaling**  
742 **pathway. (A)** Left panel, Western blot analysis of STAT3<sup>total</sup> and STAT3<sup>pY705</sup> in CV-B4 E2  
743 infected cells (+) and in matched mock uninfected cells (-). Right panel, relative  
744 quantification of STAT3<sup>total</sup> and STAT3<sup>pY705</sup> in CV-B4 E2<sub>MOI = 0.05</sub> infected cells (+) and in  
745 day matched mock uninfected cells (-) ( $n = 4-5$ ); box-and-whisker plots representing  
746 CV-B4 E2<sub>MOI = 0.05</sub> infected cells, extend from minimum to maximum values, with lines at  
747 medians; mock samples are represented as a dashed line set at  $y = 1$ . **(B)** Fold change of  
748 *Bcl2* mRNA in CV-B4 E2<sub>MOI = 0.05</sub> infected cells (grey histograms) relative to matched  
749 mock uninfected cells (white histograms);  $n = 3-6$ . **(C)** *Il6* mRNA relative expression in  
750 CV-B4 E2<sub>MOI = 0.05</sub> infected cells (+) and in matched mock uninfected cells (-);  $n = 6$ . **(D)**  
751 Quantification of extracellular IL-6R $\alpha$  by flow cytometry in CV-B4 E2<sub>MOI = 0.05</sub> infected cells  
752 (+) and in matched mock uninfected cells (-); data are represented as MFI value relative  
753 to isotype control;  $n = 4-5$ . **(E)** Left panel, Western blot analysis of SOCS3 in CV-B4 E2  
754<sub>MOI = 0.05</sub> infected cells (+) in day matched mock uninfected cells (-). Right panel, relative  
755 quantification of SOCS3 in CV-B4 E2<sub>MOI = 0.05</sub> infected cells (+) and in day matched mock  
756 uninfected cells (-);  $n = 2-3$ . **(F)** Left panel, Western blot analysis of JNK<sup>total</sup> and  
757 phosphorylated JNK in CV-B4 E2<sub>MOI = 0.05</sub> infected cells (+) and in matched mock  
758 uninfected cells (-); two independent experiments are represented. Right panel, relative  
759 quantification of JNK<sup>total</sup> and phosphorylated JNK in CV-B4 E2<sub>MOI = 0.05</sub> infected cells (+)  
760 and in matched mock uninfected cells (-);  $n = 3$ . **(G)** Left panel, Western blot analysis of  
761 total ERK and p-ERK in CV-B4 E2<sub>MOI = 0.05</sub> infected cells (+) and in matched mock  
762 uninfected cells (-). Right panel, relative quantification of ERK<sup>total</sup> and phosphorylated  
763 ERK in CV-B4 E2<sub>MOI = 0.05</sub> infected cells (+) and in matched mock uninfected cells (-);  
764  $n = 1$ . **(B, E, F-G)** Histograms represents average  $\pm$  SEM. **(A-F)**, Ratio paired  $t$  test,

765 \*\* $p < 0.01$  and \* $p < 0.05$ ; (**A-B**) one-way ANOVA, # $p < 0.05$ .

766

767 **Table 1. Putative transcription factor binding site in the region -68/-22 and**  
 768 **-168/-116.**

| <i>Murine Igf2 P3 (-68 to -22)</i> |             |                    |        |
|------------------------------------|-------------|--------------------|--------|
| Name                               | Motif ID    | GeneID             | Score  |
| Klf6                               | M08857_2.00 | ENSMUSG00000000078 | 16.87  |
| Klf4                               | M08857_2.00 | ENSMUSG00000003032 | 16.87  |
| Klf5                               | M08857_2.00 | ENSMUSG00000005148 | 16.87  |
| Klf7                               | M08857_2.00 | ENSMUSG00000025959 | 16.87  |
| Klf3                               | M08857_2.00 | ENSMUSG00000029178 | 16.87  |
| Klf1                               | M08857_2.00 | ENSMUSG00000054191 | 16.87  |
| Klf2                               | M08857_2.00 | ENSMUSG00000055148 | 16.87  |
| Klf12                              | M08857_2.00 | ENSMUSG00000072294 | 16.87  |
| Klf15                              | M08907_2.00 | ENSMUSG00000030087 | 16.49  |
| Patz1                              | M08864_2.00 | ENSMUSG00000020453 | 15.798 |
| Klf8                               | M08871_2.00 | ENSMUSG00000041649 | 14.828 |
| Sp1                                | M09016_2.00 | ENSMUSG00000001280 | 16.03  |
| Sp4                                | M09016_2.00 | ENSMUSG00000025323 | 16.03  |
| Sp3                                | M09016_2.00 | ENSMUSG00000027109 | 16.03  |
| Sp6                                | M09016_2.00 | ENSMUSG00000038560 | 16.03  |
| Sp8                                | M09016_2.00 | ENSMUSG00000048562 | 16.03  |
| Sp9                                | M09016_2.00 | ENSMUSG00000068859 | 16.03  |
| Sp5                                | M09016_2.00 | ENSMUSG00000075304 | 16.03  |
| Zfp341                             | M08892_2.00 | ENSMUSG00000059842 | 15.256 |
| Zfp263                             | M08272_2.00 | ENSMUSG00000022529 | 14.357 |
| Q8K439_MOUSE                       | M08272_2.00 | Q8K439_MOUSE       | 14.357 |
| Nkx2-1                             | M08136_2.00 | ENSMUSG00000001496 | 13.307 |
| Nkx2-5                             | M08136_2.00 | ENSMUSG00000015579 | 13.307 |
| Nkx2-2                             | M08136_2.00 | ENSMUSG00000027434 | 13.307 |
| Nkx2-6                             | M08136_2.00 | ENSMUSG00000044186 | 13.307 |
| Nkx2-3                             | M08136_2.00 | ENSMUSG00000044220 | 13.307 |
| Nkx2-4                             | M08136_2.00 | ENSMUSG00000054160 | 13.307 |
| Nkx2-9                             | M08136_2.00 | ENSMUSG00000058669 | 13.307 |

769

770

771

772

773

774

**Murine *Igf2 P3* (-168 to -116)**

| <b>Name</b>  | <b>Motif ID</b> | <b>GeneID</b>      | <b>Score</b> |
|--------------|-----------------|--------------------|--------------|
| Zfp263       | M08082_2.00     | ENSMUSG00000022529 | 14.251       |
| Q8K439_MOUSE | M08082_2.00     | Q8K439_MOUSE       | 14.251       |
| Maz          | M08988_2.00     | ENSMUSG00000030678 | 13.087       |
| Prdm5        | M08986_2.00     | ENSMUSG00000029913 | 13.783       |
| Zfp383       | M07689_2.00     | ENSMUSG00000099689 | 13.452       |
| Sp1          | M09016_2.00     | ENSMUSG00000001280 | 15.157       |
| Sp4          | M09016_2.00     | ENSMUSG00000025323 | 15.157       |
| Sp3          | M09016_2.00     | ENSMUSG00000027109 | 15.157       |
| Sp6          | M09016_2.00     | ENSMUSG00000038560 | 15.157       |
| Sp8          | M09016_2.00     | ENSMUSG00000048562 | 15.157       |
| Sp9          | M09016_2.00     | ENSMUSG00000068859 | 15.157       |
| Sp5          | M09016_2.00     | ENSMUSG00000075304 | 15.157       |
| Etv3         | M09055_2.00     | ENSMUSG00000003382 | 13.617       |
| Etv1         | M09055_2.00     | ENSMUSG00000004151 | 13.617       |
| Etv2         | M09055_2.00     | ENSMUSG00000006311 | 13.617       |
| Elk3         | M09055_2.00     | ENSMUSG00000008398 | 13.617       |
| Gabpa        | M09055_2.00     | ENSMUSG00000008976 | 13.617       |
| Elk1         | M09055_2.00     | ENSMUSG00000009406 | 13.617       |
| Etv5         | M09055_2.00     | ENSMUSG00000013089 | 13.617       |
| Fli1         | M09055_2.00     | ENSMUSG00000016087 | 13.617       |
| Etv4         | M09055_2.00     | ENSMUSG00000017724 | 13.617       |
| Ets2         | M09055_2.00     | ENSMUSG00000022895 | 13.617       |
| Elk4         | M09055_2.00     | ENSMUSG00000026436 | 13.617       |
| Elf4         | M09055_2.00     | ENSMUSG00000031103 | 13.617       |
| Ets1         | M09055_2.00     | ENSMUSG00000032035 | 13.617       |
| Elf1         | M09055_2.00     | ENSMUSG00000036461 | 13.617       |
| Elf2         | M09055_2.00     | ENSMUSG00000037174 | 13.617       |
| Erg          | M09055_2.00     | ENSMUSG00000040732 | 13.617       |
| Erf          | M09055_2.00     | ENSMUSG00000040857 | 13.617       |
| Fev          | M09055_2.00     | ENSMUSG00000055197 | 13.617       |
| XP_911724.4  | M09055_2.00     | XP_911724.4        | 13.617       |
| Zfp263       | M07844_2.00     | ENSMUSG00000022529 | 16.224       |
| Q8K439_MOUSE | M07844_2.00     | Q8K439_MOUSE       | 16.224       |
| Zfp281       | M08999_2.00     | ENSMUSG00000041483 | 13.023       |
| E2f4         | M09034_2.00     | ENSMUSG00000014859 | 14.084       |
| E2f3         | M09034_2.00     | ENSMUSG00000016477 | 14.084       |
| E2f2         | M09034_2.00     | ENSMUSG00000018983 | 14.084       |
| E2f1         | M09034_2.00     | ENSMUSG00000027490 | 14.084       |
| E2f5         | M09034_2.00     | ENSMUSG00000027552 | 14.084       |
| E2f6         | M09034_2.00     | ENSMUSG00000057469 | 14.084       |
| Sall4        | M08866_2.00     | ENSMUSG00000027547 | 13.786       |
| Patz1        | M08287_2.00     | ENSMUSG00000020453 | 14.129       |

776 **Table 2. CV-B4 E2 mRNA detection by RT-PCR performed in other studies.**

| Tissue   | Days P.I. |     |     |     |     | Study                                      | Processing | Viral dose<br>(TCID <sub>50</sub> ) | Inoculation<br>method |
|----------|-----------|-----|-----|-----|-----|--------------------------------------------|------------|-------------------------------------|-----------------------|
|          | 2         | 3   | 7   | 8   | 10  |                                            |            |                                     |                       |
|          | 2/2       | 2/2 | 2/2 | n/a | 2/2 | <i>Jaïdane et. al.</i> , [2006]            | WT         | 10 <sup>4.74</sup>                  | Oral                  |
| Pancreas | n/a       | n/a | n/a | 2/2 | n/a | <i>Aguech-Oueslati et. al.</i> ,<br>[2017] | WT         | 10 <sup>5</sup>                     | Oral<br>I.P.          |
|          | 6/6       | 6/6 | 2/6 | n/a | n/a | Actual study                               | WT         | 10 <sup>6</sup>                     | I.P.                  |
|          | 2/2       | 2/2 | 2/2 | n/a | 1/2 | <i>Jaïdane et. al.</i> , [2006]            | WT         | 10 <sup>4.74</sup>                  | Oral                  |
| Thymus   | n/a       | n/a | n/a | 2/2 | n/a | <i>Aguech-Oueslati et. al.</i> ,<br>[2017] | WT         | 10 <sup>5</sup>                     | Oral + I.P.           |
|          | 0/6       | 0/6 | 0/6 | n/a | n/a | Actual study                               | EP         | 10 <sup>6</sup>                     | I.P.                  |

WT, whole tissue; EP, enzymatic processing; I.P., intra-peritoneal; n/a, no data; 2/2 represents two positive samples for two independent biological samples tested

777

778

779

780

781

782

783

784

785

786

787

788 **Table 3. Sequences of qPCR primers, site-directed mutagenesis primers**

789 **Table 3-1. qPCR primers sequence**

| Gene                | Sequence 5'-3'                       | PCR product size (bp) |
|---------------------|--------------------------------------|-----------------------|
| <i>Hprt</i>         | Forward: TTATCAGACTGAAGAGCTACTGTAATG | 108                   |
|                     | Reverse: CTTCAACAATCAAGACATTCTTTCC   |                       |
| <i>Igf2 (total)</i> | Forward: GGGAGCTTGTGGACACGC          | 107                   |
|                     | Reverse: GCACTCTTCCACGATGCCA         |                       |
| <i>Igf2 V1</i>      | Forward: CCGGCTTCCAGGTACCAAT         | 91                    |
|                     | Reverse: GCAGCGATGCAGCACAAG          |                       |
| <i>Igf2 V2</i>      | Forward: GCCCTTCTCCTCCGATCCT         | 99                    |
|                     | Reverse: ATGAGAAGCACCAACATCGACTT     |                       |
| <i>Igf2 V3</i>      | Forward: CCAGCCTTTTCTGTCTTCATC       | 69                    |
|                     | reverse: CCATTGGTACCTGAAGTTGGGTAA    |                       |
| <i>Birc5</i>        | Forward: TCTGGCAGCTGTACCTCAAGAACT    | 148                   |
|                     | Reverse: AAACACTGGGCCAAATCAGGCT      |                       |
| <i> Tp53</i>        | Forward: TTCATTGGGACCATCCTGGC        | 121                   |
|                     | Reverse: TGGCAGTCATCCAGTCTTCG        |                       |
| <i>Bcl2</i>         | Forward: GTGAACTGGGGGAGGATTGT        | 216                   |
|                     | Reverse: GGAGAAATCAAACAGAGGCC        |                       |
| <i>Il6</i>          | Forward: GTTCTCTGGGAAATCGTGGA        | 208                   |
|                     | Reverse: TGTACTCCAGGTAGCTATGG        |                       |

790

791

792

793

794



795 **Table 3-2. Site-directed mutagenesis primers sequence**

| <i>Igf2 P3</i> plasmid<br>(sequence relative to TSS) | Primer                           | Annealing (°C) |
|------------------------------------------------------|----------------------------------|----------------|
| P243                                                 | Forward: GGTAGGGTGGAGCCGGGA      | 68°C           |
| -68/+175                                             | Reverse: GAGCTCAGGTACCGGCCA      |                |
| P149                                                 | Forward: AACCTTCCAGCCTTTTCCTGT   | 66°C           |
| +26/+175                                             | Reverse: GAGCTCAGGTACCGGCCA      |                |
| P98                                                  | Forward TTACCCAACTTCAGGTAACCAGG  | 70°C           |
| +77/+175                                             | Reverse: GAGCTCAGGTACCGGCCA      |                |
| P197                                                 | Forward: GGAGGCACTGACCAGTTCG     | 67°C           |
| -22/+175                                             | Reverse: GAGCTCAGGTACCGGCCA      |                |
| P169                                                 | Forward: ACATTAGCTTCTCCTGTGAGAAC | 65°C           |
| +6/+175                                              | Reverse: GAGCTCAGGTACCGGCCA      |                |
| P291                                                 | Forward : GCGGGTGCAAAGGGGGCG     | 70°C           |
| -116/+175                                            | Reverse: GAGCTCAGGTACCGGCCAGTTAG |                |
| P230                                                 | Forward : GGGACTGGGAGGAGCCAC     | 71°C           |
| -55/+175                                             | Reverse: GAGCTCAGGTACCGGCCA      |                |
| P248*                                                | Forward : CGGAGGCACTGACCAGTTC    | 67°C           |
| -167/-116 <sup>Δ-116/-22</sup> -22/+175              | Reverse: CCCCTCCCTCCTTCCAGC      |                |
| P307*                                                | Forward: GGCGGGTGCAAAGGGGGC      | 69°C           |
| -167/-151 <sup>Δ-151/-116</sup> -116/+175            | Reverse: CACCCCAAGAGCTAGCGAGC    |                |
| Sequencing primer                                    | Forward: CTAGCAAATAGGCTGTCCC     |                |
|                                                      | Reverse: ACTGCATTCTAGTTGTGGTTTGC |                |

796

797

798

799

800 **Table 4. List of antibody used for Western Blot**

| <b>Primary antibody</b>      | <b>Dilution</b> | <b>Supplier</b>           | <b>Clone</b>        |
|------------------------------|-----------------|---------------------------|---------------------|
| Rabbit anti-IGF2             | 1:500           | AVIVA SYSTEMS BIOLOGY     | OAAB07463           |
| Rabbit anti-STAT3            | 1:1000          | Cell Signaling Technology | D3Z2G               |
| Rabbit anti-STAT3 (p705 Tyr) | 1:1000          | Cell Signaling Technology | D3A7                |
| Rabbit anti-JNK/SAPK         | 1:1000          | Cell Signaling Technology |                     |
| Rabbit anti-pJNK             | 1:1000          | Cell Signaling Technology | 81E11               |
| Rabbit anti-ERK (1/2)        | 1:1000          | Cell Signaling Technology | 137F5               |
| Rabbit anti-pERK (1/2)       | 1:1000          | Cell Signaling Technology | Anti-rabbit IgG HRP |
| Rabbit anti-SOCS3            | 1:1000          | Cell Signaling Technology | Anti-rabbit IgG HRP |
| Mouse anti-GAPDH             | 1:1000          | Pierce                    | GA1R                |
| Mouse anti- $\beta$ tubulin  | 1:1000          | Pierce                    | BT7R                |
| Mouse anti-VP1               | 1:1000          | Dako                      | 5-D8/1              |

801

802

803

804

805

806

807

808

809

810

811

812

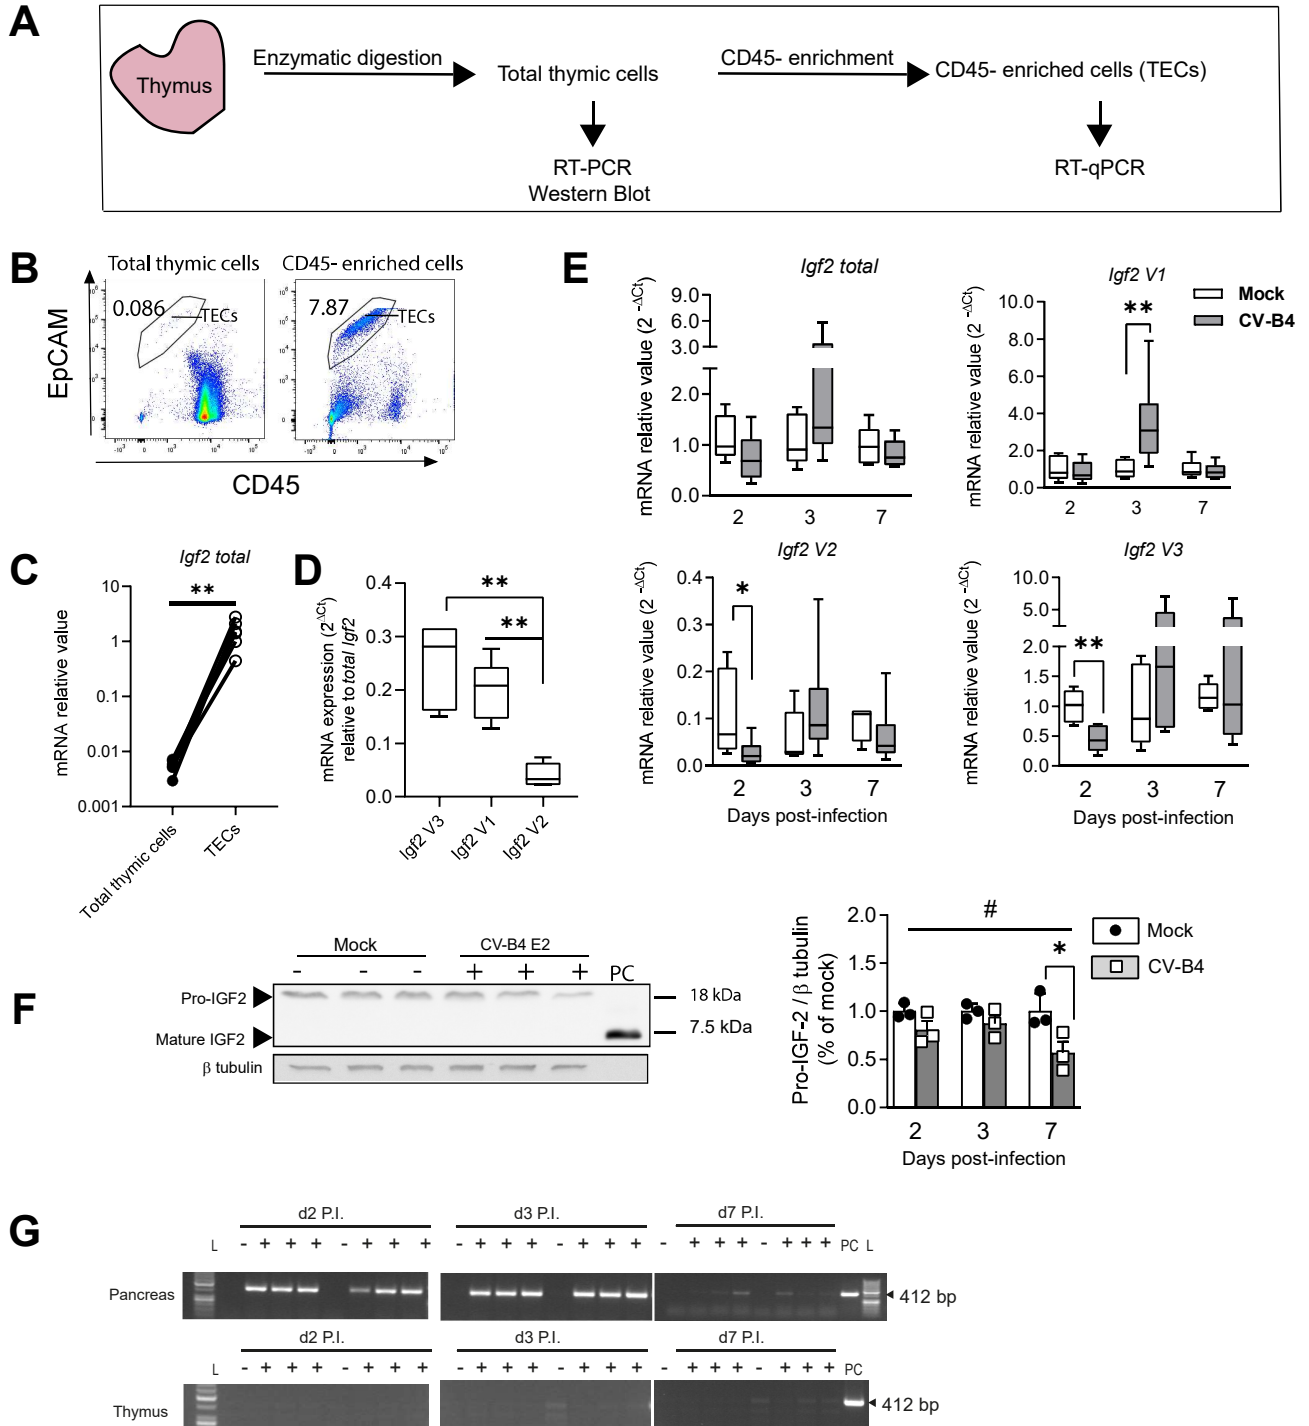



**A**

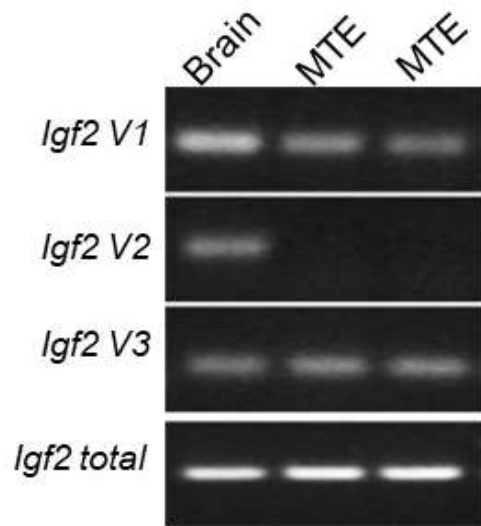

**B**

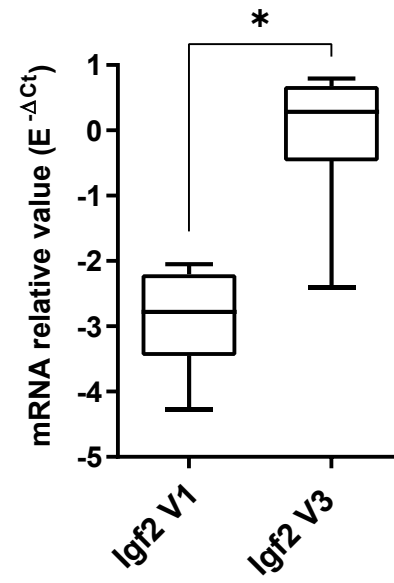

**A**

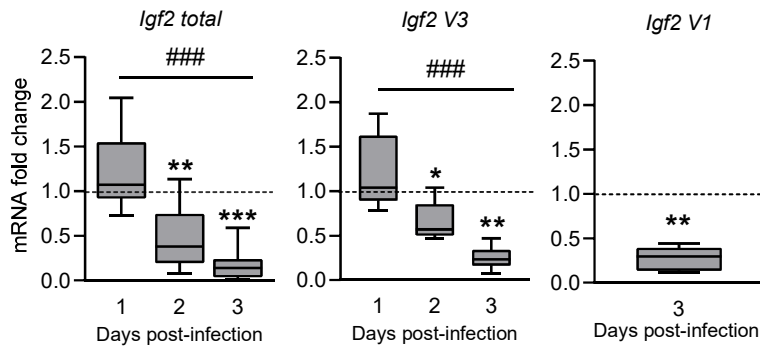

**B**

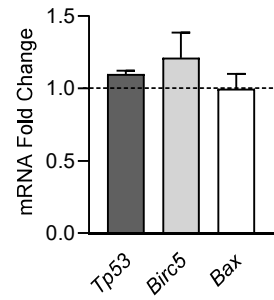

**C**

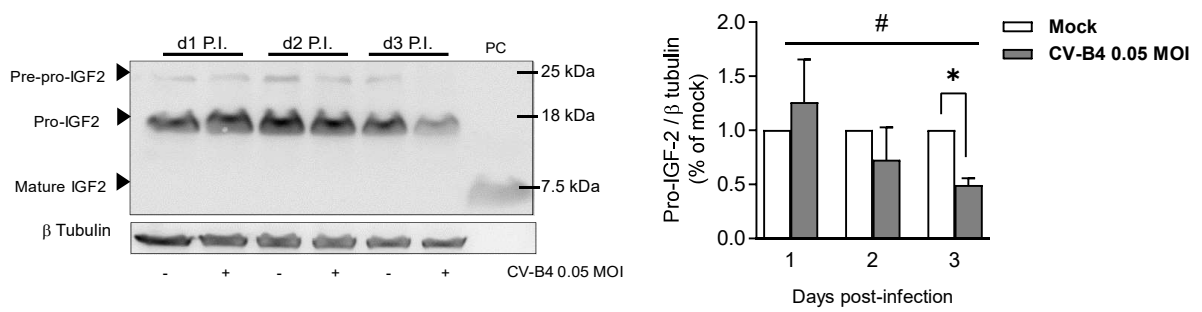

**D**

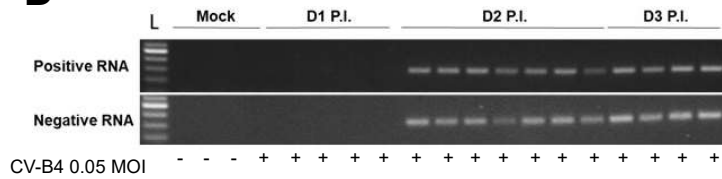

**E**

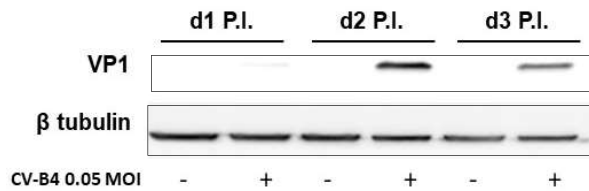

**F**

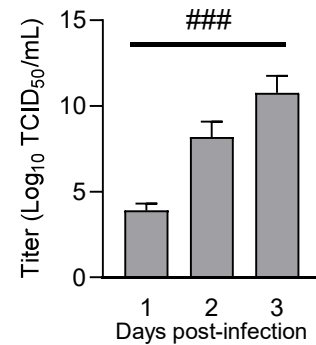

**A**

*NheI*

1 **GCTAGC**TCTT GGGGGTGCAG GAGAAAAGGG ACTGGCTGGA AGGAGGGAGG  
**-168**

50 GGGCGGGTGC AAAGGGGGCG GGGGGAGTGG TCAGCAGGGA GGGGGTGGGG

100 GGTAGGGTGG AGCCGGGACT GGGAGGAGCC ACTCAGACAT AAAAAGCGGA

150 GGCAGTACC AGTTCGC**AAA** CTGGACATTA GCTTCTCCTG TGAGAACCTT  
**+1**

200 CCAGCCTTTT CCTGTCTTCA TCCTCTTCCA GCCCAGCGG CCTCCTTACC

250 CAACTTCAGG TAACCAGGGC TGTGGAGCCA GGACCCTGCT GCCATCCCCA

300 CTCCGGCTTG CCCAGTGGGG TGGTCAGGGC ACCGGGTAGC CTG**GATATC**  
*EcoRV*  
**+175**

**B**

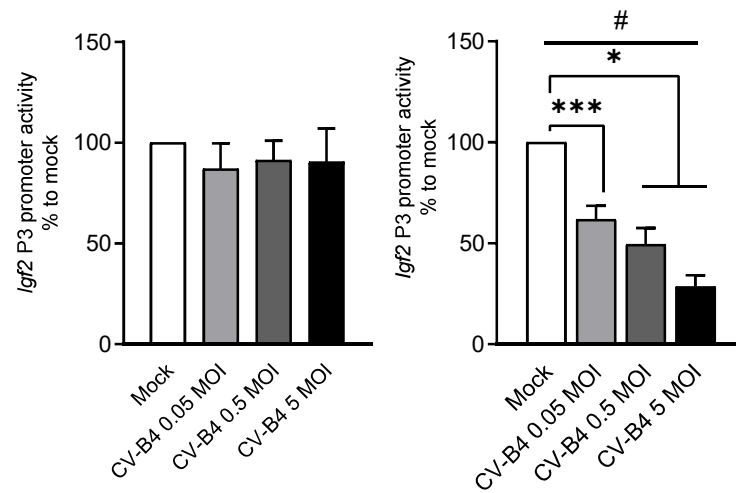

**C**

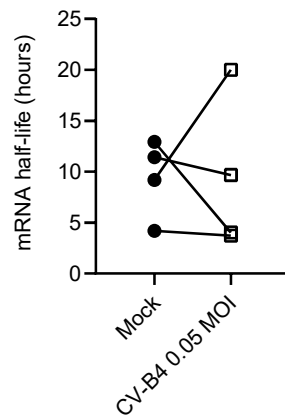

**A**

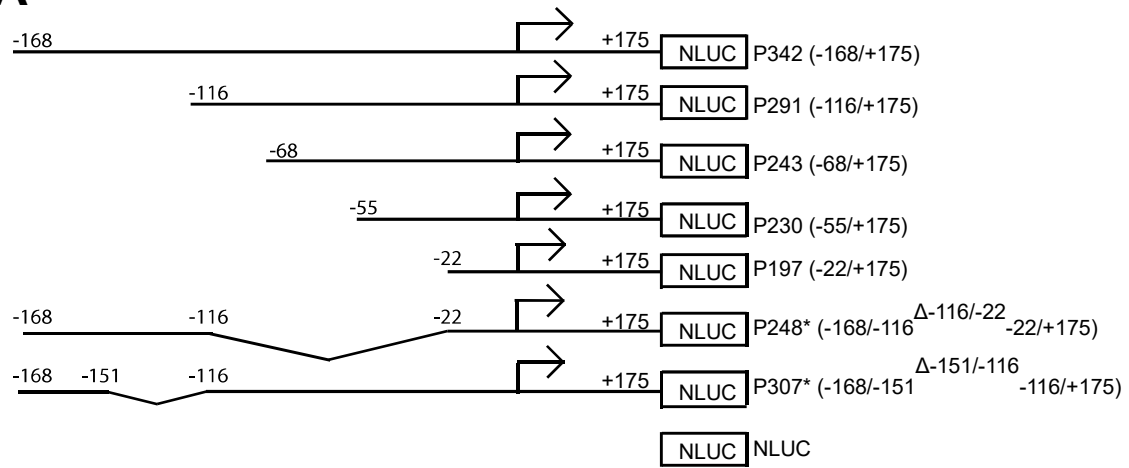

**B**

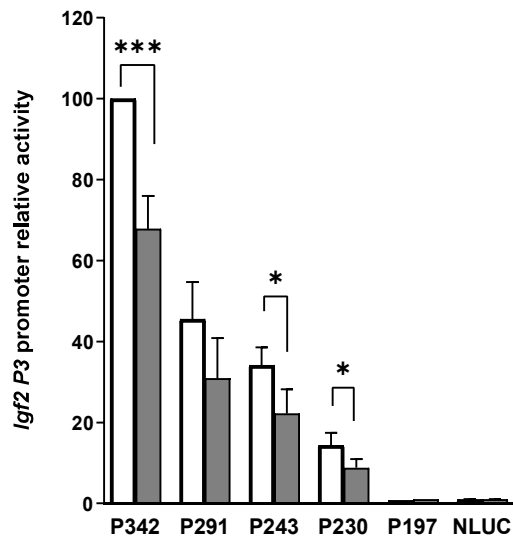

**C**

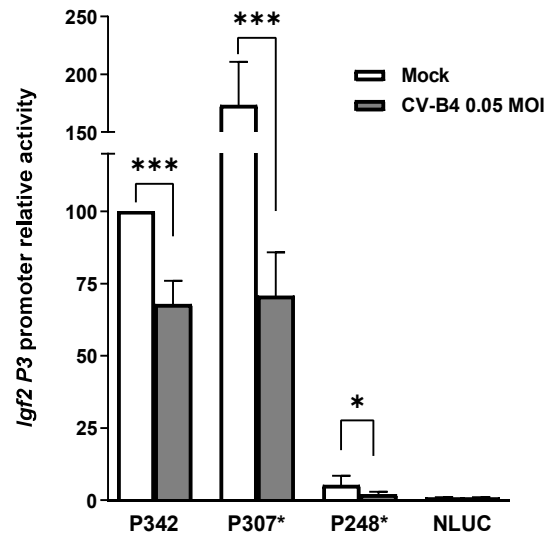



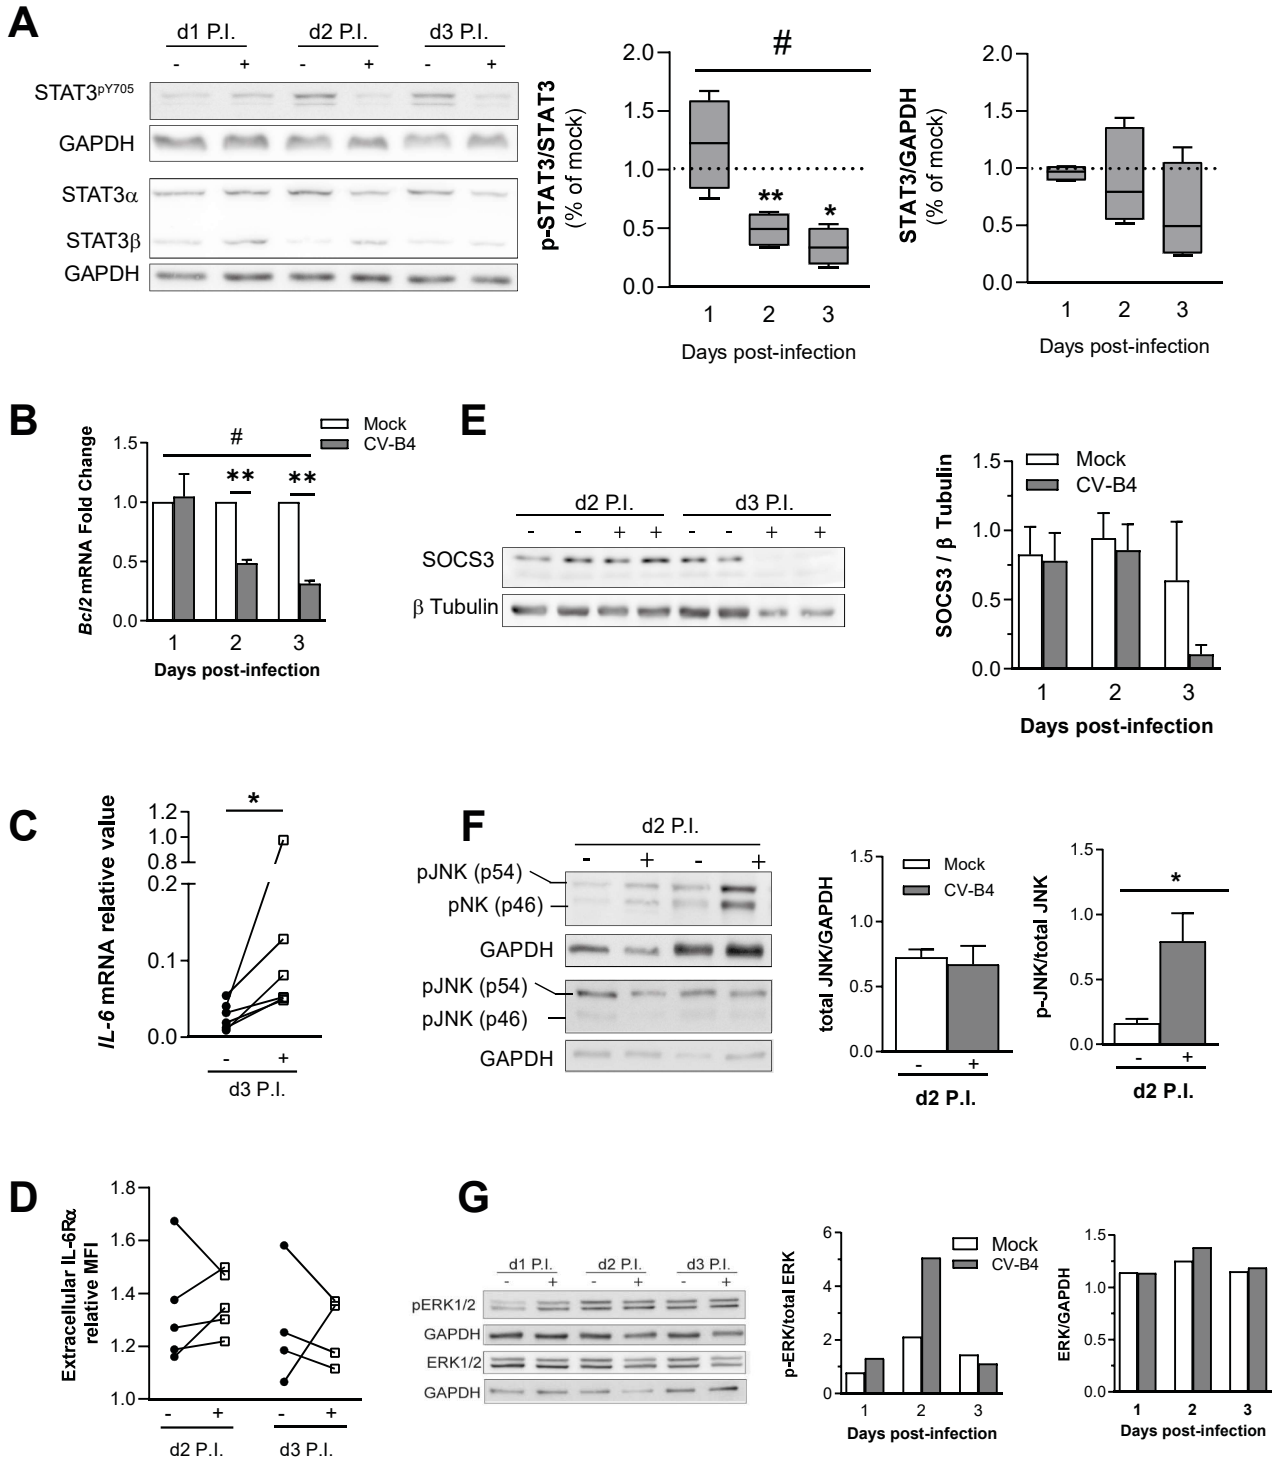

Source: https://www.biorxiv.org/content/10.1101/2020.01.10.902684v1.full.pdf
